# Supplementary material
Source: PubMed Central journal article supplement (PMC5506780)
Supplement: NIHMS877789-supplement-ESI.pdf [file NIHMS877789-supplement-ESI.pdf]

## Supplementary Materials

### **A multichannel nanosensor for instantaneous readout of cancer drug mechanisms**

Subinoy Rana,<sup>1</sup> Ngoc D. B. Le,<sup>1,#</sup> Rubul Mout,<sup>1,#</sup> Krishnendu Saha,<sup>1</sup> Gulen Yesilbag Tonga,<sup>1</sup>  
Robert E. S. Bain,<sup>3</sup> Oscar R. Miranda,<sup>1</sup> Caren M. Rotello<sup>2</sup> & Vincent M. Rotello<sup>1\*</sup>

<sup>1</sup>Department of Chemistry, <sup>2</sup>Department of Psychology, University of Massachusetts Amherst, 710 N. Pleasant St., Amherst, MA 01003, USA. <sup>3</sup>Department of Materials, Imperial College London, South Kensington Campus, London SW7 2AZ, UK.

## Table of Contents

|                                                                             |    |
|-----------------------------------------------------------------------------|----|
| Section 1: Synthesis of the Sensor Elements .....                           | 3  |
| Section 2: Sensor Fabrication .....                                         | 11 |
| Section 3: Determination of FICI .....                                      | 20 |
| Section 4: Statistical Methods.....                                         | 21 |
| Section 5: Validation of the Drug Screening Methodology.....                | 25 |
| Section 6: Discussions on the Importance of the Fluorescence Channels ..... | 36 |
| Section 7: Supplementary Data.....                                          | 40 |
| Section 8: <sup>1</sup> H NMR Spectra .....                                 | 49 |
| Supplementary References.....                                               | 53 |

## Section 1: Synthesis of the Sensor Elements

**1.1 Cloning and expression of fluorescent proteins.** Genetic manipulations and bacterial culture were performed according to standard protocols. The gene encoding EBFP2 protein was PCR amplified from a pBad-EBFP2 plasmid<sup>1</sup> (Addgene, No. 14891) using primers 5'-ACGATGGATCCATGGTGAG C-3' (forward) and 5'-GTGACAAGCTTTTACTTGTACAG-3' (reverse). The amplified product was cloned into pQE80 vector digested with *Bam*HI and *Hind*III restriction sites (downstream of 6xHis tag) to obtain the expression construct pQE80-6xHis-EBFP2.

To construct pQE80-6xHis-tdTomato plasmid, tdTomato gene was sub-cloned from pASTA3 (from Addgene<sup>2,3</sup>) plasmid into *Bam*HI and *Hind*III (downstream of 6xHis tag) restriction sites of pQE80 expression vector. pET21d-EGFP plasmid (Novagen<sup>4</sup>) containing 6xHis tag in the N-terminus was used for EGFP expression.

To produce recombinant proteins, *Escherichia coli* BL21(DE3) strain was transformed with the respective plasmids. Transformed colonies were picked up to grow small cultures in 50 mL 2xYT media at 37<sup>0</sup>C for overnight. The following day, 15 mL of grown culture was inoculated into one liter 2xYT media and allowed to grow at 37<sup>0</sup>C until optical density (OD) at 600 nm reaches ~0.6. At this point, the protein expression was induced by adding isopropyl- $\beta$ -D-thiogalactopyranoside (IPTG; 1 mM final concentration) at 25<sup>0</sup>C. After four hours of induction, the cells were harvested and the pellets were lysed using microfluidizer. His-tag fluorescent proteins were purified from the lysed supernatant using Co<sup>2+</sup>-nitrilotriacetate columns (HisPur™ cobalt spin columns, Pierce, Thermo Scientific). The integrity and the expression of native protein were confirmed by 12% SDS-PAGE gel, absorbance, and fluorescence spectra.

**1.2 Synthesis of BenzNP.** The organic ligand and the NP core were synthesized following the previous report<sup>5,6</sup>. This section describes the full experimental details of all performed reactions for the syntheses of the ligand and the particle, as well as their standard characterizations (<sup>1</sup>H NMR spectra and Supplementary Fig. 1 – 3).

**1.2.1 General.** All chemicals and solvents for syntheses were purchased from Fisher Scientific, except H<sub>2</sub>AuCl<sub>4</sub> that was purchased from Strem Chemicals Inc., and used without further purification, unless otherwise stated. Yields refer to chromatographically and spectroscopically (<sup>1</sup>H NMR) homogeneous material, unless otherwise stated. Reactions were monitored by thin-layer chromatography performed on 0.25 mm Sorbent Technologies aluminium backed silica gel plates (w/UV254), using ultraviolet radiation as the visualizing agent and one of the following as developing agents: an acidic solution of ceric ammonium molybdate and heat, or KMnO<sub>4</sub>/heat.

**1.2.2 NMR spectroscopy.** NMR spectra were recorded on Bruker Avance 400 instrument and were calibrated using residual undeuterated solvent as an internal reference (CHCl<sub>3</sub> at 7.26 p.p.m. <sup>1</sup>H-NMR). The following abbreviations were used to explain NMR peak multiplicities: s, singlet; d, doublet; t, triplet; q, quartet; p, quintet (pentet); m, multiplet; br, broad (see the <sup>1</sup>H NMR spectra section).

**1.2.3 Mass spectrometry.** Matrix assisted laser desorption/ionization mass spectrometry (MALDI-MS) has been performed to characterize the surface ligand on the **BenzNP**. A saturated  $\alpha$ -cyano-4-hydroxycinnamic acid ( $\alpha$ -CHCA) stock solution was prepared in 70% acetonitrile, 30% H<sub>2</sub>O, and 0.1% TFA. An equal volume of 2  $\mu$ M **BenzNP** solution was added to the matrix stock solution. 2.5  $\mu$ L of this mixture was spotted on the sample carrier, and MALDI-MS analysis was performed on a Bruker Autoflex III mass spectrometer.

**1.2.3 Dynamic light scattering.** Hydrodynamic diameter and zeta potential of **BenzNP** was measured at 25°C by dynamic light scattering (DLS) in 5 mM phosphate buffer (pH=7.4) using a Malvern Zetasizer Nano ZS instrument. The measurement angle was 173° (backscatter). Data were analysed by the “multiple narrow modes” (high resolution) based on non-negative-least-squares (NNLS). 1 μM of **BenzNP** was placed in a cuvette and average of 3 measurements was considered.

**1.2.4 Detailed protocol for the synthetic of the nanoparticle capping ligand (benzyl-ligand)**

The following scheme describes the steps to synthesize the ligand covering **BenzNP**.

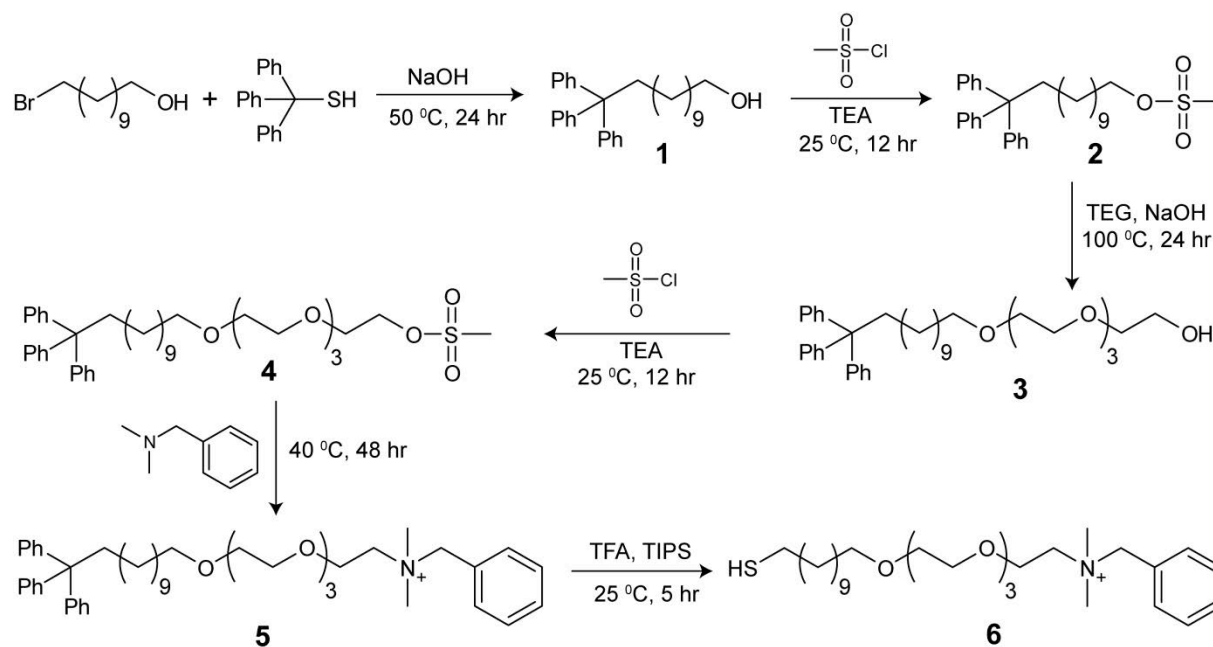

**Supplementary Scheme 1.** The scheme followed for synthesis of the benzyl-ligand **6** for functionalizing **BenzNP**.

**Synthesis of compound 1:** 11-bromo-1-undecanol (8.22 g, 32.74 mmol) was dissolved in 80 mL 1:1 ethanol/toluene mixture. Triphenylmethanethiol (10.86 g, 39.29 mmol) dissolved in 80 mL 1:1 ethanol/toluene was added to 11-bromo-1-undecanol in solution. Then, sodium hydroxide (1.96 g, 49.11 mmol) was dissolved in 2 mL water and added to the mixture. The reaction

mixture was stirred for 24 hours at 50°C. Upon completion, the reaction mixture was extracted twice with a saturated solution of sodium bicarbonate (NaHCO<sub>3</sub>). The organic layer was extracted, dried over sodium sulfate (Na<sub>2</sub>SO<sub>4</sub>), and concentrated using a rotavapor. The crude product was purified by column chromatography over silica gel using hexane/ethyl acetate (1:1, v/v) as the eluent. The solvent was removed in vacuum to obtain compound **1** as colorless oil (yield: 13.88 g, 95%).

**<sup>1</sup>H NMR (400 MHz, CDCl<sub>3</sub>, TMS) of Compound 1 :** δ 7.48-7.40 (m, 6H, *H*Ar-), 7.37-7.27 (m, 6H, *H*Ar-), 7.26-7.18 (m, 3H, *H*Ar-), 3.65 (t, *J* = 6.7Hz, 2H, **CH**<sub>2</sub>OH), 2.16 (t, *J* = 7.2Hz, 2H, **CH**<sub>2</sub>-), 1.66-1.52 (m, 2H, -SCH<sub>2</sub>**CH**<sub>2</sub>), 1.44-1.12 (m, 16H, **-CH**<sub>2</sub>CH<sub>2</sub>OH + **-(CH**<sub>2</sub>)<sub>8</sub>CH<sub>2</sub>OH).

**Synthesis of compound 2:** Compound **1** (13.88 g, 31.1 mmol) in 150 mL dry dichloromethane (DCM) was mixed with triethylamine (TEA) (4.72g, 6.48 mL, 46.65 mmol), followed by dropwise addition of methanesulfonyl chloride (3.92 g, 2.65mL, 34.21 mmol) in ice bath. After 30 minutes the reaction mixture was warmed to room temperature and stirred for 12 hr. After the reaction was completed (by TLC), solvent was evaporated. The compound was diluted again with 100 mL DCM and extracted with 100 mL 0.1 M HCl twice. The organic layer was collected, neutralized with a saturated NaHCO<sub>3</sub> solution, and washed with water three times. Following extraction, the organic layer was dried over Na<sub>2</sub>SO<sub>4</sub> and concentrated at reduced pressure. The crude product was purified by column chromatography over silica gel using hexane/ethyl acetate (1:1, v/v) as the eluent. Solvent was removed in vacuum to obtain the mesylated compound **2** as light yellow oil (yield: 15 g, 92%).

**<sup>1</sup>H NMR (400 MHz, CDCl<sub>3</sub>, TMS) of Compound 2:** δ 7.48-7.40 (m, 6H, *H*Ar-), 7.34-7.27 (m, 6H, *H*Ar-), 7.26-7.19 (m, 3H, *H*Ar-), 4.24 (t, *J* = 6.8Hz, 2H, **-CH**<sub>2</sub>SO<sub>3</sub>CH<sub>3</sub>), 3.01 (s, 3H, -SO<sub>3</sub>**CH**<sub>3</sub>), 2.16 (t, *J* = 7.6Hz, **-SCH**<sub>2</sub>-), 1.76 (p, *J* = 6.8Hz, 2H, **-CH**<sub>2</sub>CH<sub>2</sub>SO<sub>3</sub>CH<sub>3</sub>), 1.41 (p, *J* = 7.2Hz, 4H, -SCH<sub>2</sub>**CH**<sub>2</sub>- + -SCH<sub>2</sub>CH<sub>2</sub>**CH**<sub>2</sub>-), 1.35-1.1 (m, 12H, **-(CH**<sub>2</sub>)<sub>6</sub>CH<sub>2</sub>CH<sub>2</sub>SO<sub>3</sub>CH<sub>3</sub>).

**Synthesis of compound 3:** First, NaOH (1.37 g, 34.3 mmol) solution (1 mL) was added to 99.24 mL of tetraethyleneglycol (TEG) (111.15 g, 57.22 mmol) and stirred for 2 hr at 80 °C. To this reaction mixture, 15 g of 11-(tritylthio)undecyl methanesulfonate (compound 2) was added and stirred for 48 hr at 100 °C. The product was extracted in hexane/ethyl acetate (4:1, v/v) six times. Then, the organic layer was concentrated at reduced pressure and the crude product was purified by column chromatography over silica gel using ethyl acetate as the eluent. The solvent was removed in vacuum to obtain compound 3 as light yellow oil (yield: 15.28 g, 68%).

**<sup>1</sup>H NMR (400 MHz, CDCl<sub>3</sub>, TMS) of Compound 3:** δ 7.47-7.40 (m, 6H, *HAr*-), 7.34-7.26 (m, 6H, *HAr*-), 7.25-7.19 (m, 3H, *HAr*-), 3.77-3.57 (m, 16H, -CH<sub>2</sub>-(OCH<sub>2</sub>CH<sub>2</sub>)<sub>4</sub>-OH), 3.46 (t, *J* = 6.8 Hz, 2H, -CH<sub>2</sub>-(OCH<sub>2</sub>CH<sub>2</sub>)<sub>4</sub>-OH), 2.95 (br, s, 1H, -TEG-OH), 2.15 (t, *J* = 7.2Hz, -SCH<sub>2</sub>-), 1.59 (p, *J* = 7.2Hz, 2H, -CH<sub>2</sub>CH<sub>2</sub>TEG-OH), 1.4 (p, *J* = 7.6Hz, 2H, -SCH<sub>2</sub>CH<sub>2</sub>-), 1.35-1.13(m, 14H, -(CH<sub>2</sub>)<sub>7</sub>CH<sub>2</sub>CH<sub>2</sub>TEG-OH).

**Synthesis of compound 4:** Triethylamine (3.26g, 4.49 mL, 32.2 mmol) was added to compound 3 (10 g, 16.1 mmol) in 100 mL dry DCM in an ice bath. Methanesulfonyl chloride (2.77 g, 1.87 mL, 24.1 mmol) was added dropwise to the reaction mixture in ice-bath. After 30 minutes the reaction mixture was warmed up to room temperature and stirred overnight. The reaction mixture was worked up and the organic layer was extracted. The extracted DCM layer was dried over Na<sub>2</sub>SO<sub>4</sub> and concentrated at reduced pressure. The crude product was purified by column chromatography over silica gel using ethyl acetate as the eluent. Solvent was removed in vacuum to obtain compound 4 as light yellow oil (yield 10.7 g, 95 %).

**<sup>1</sup>H NMR (400 MHz, CDCl<sub>3</sub>, TMS) of Compound 4:** δ 7.44-7.37 (m, 6H, *HAr*-), 7.31-7.23 (m, 6H, *HAr*-), 7.22-7.16 (m, 3H, *HAr*-), 4.40-4.34 (m, 2H, -CH<sub>2</sub>OSO<sub>3</sub>CH<sub>3</sub>), 3.78-3.54 (m, 14H, CH<sub>2</sub>-(OCH<sub>2</sub>CH<sub>2</sub>)<sub>3</sub>-CH<sub>2</sub>CH<sub>2</sub>OSO<sub>3</sub>CH<sub>3</sub>), 3.44 (t, *J* = 6.8Hz, 2H, CH<sub>2</sub>-CH<sub>2</sub>-(OCH<sub>2</sub>CH<sub>2</sub>)<sub>3</sub>-), 3.07 (s,

3H, -OSO<sub>3</sub>CH<sub>3</sub>), 2.12 (t, *J* = 7.2Hz, 2H, -SCH<sub>2</sub>-), 1.56 (p, *J* = 7.2Hz, 2H, -CH<sub>2</sub>CH<sub>2</sub>TEG-N(CH<sub>3</sub>)<sub>2</sub>), 1.38 (p, *J*=7.6Hz, 2H, -SCH<sub>2</sub>CH<sub>2</sub>-), 1.32-1.11 (m, 14H, -(CH<sub>2</sub>)<sub>7</sub>CH<sub>2</sub>CH<sub>2</sub>TEG).

**Synthesis of compound 5:** Compound 4 (1.075 g, 1.53 mmol) was added to dimethylbenzylamine (0.62 g, 0.7 ml, 4.6 mmol) in 10 mL ethanol. The reaction mixture was stirred at 40 °C for 48 hr. After evaporating ethanol at reduced pressure, the light yellow residue was purified by successive washings with hexane (10 mL, 4 times) and hexane/diethylether (1:1 v/v, 10 mL, 6 times) and then dried in high vacuum. The product formation was quantitative and was confirmed by NMR spectroscopy.

**<sup>1</sup>H NMR (400MHz, CDCl<sub>3</sub>, TMS) of Compound 5:** δ 7.64-7.58 (m, 2H, *H*Ar-), 7.38-7.32 (m, 9H, *H*Ar-), 7.24-7.17 (m, 6H, *H*Ar-), 7.16-7.09 (m, 3H, *H*Ar-), 4.9 (s, 2H, -CH<sub>2</sub>-C<sub>6</sub>H<sub>5</sub>), 3.94 (s, br, 2H, -OCH<sub>2</sub>CH<sub>2</sub>N(CH<sub>3</sub>)<sub>2</sub>-), 3.8 (s, br, 2H, -OCH<sub>2</sub>CH<sub>2</sub>N(CH<sub>3</sub>)<sub>2</sub>-), 3.77-3.22 (m, 12H, -(OCH<sub>2</sub>CH<sub>2</sub>)<sub>3</sub>-CH<sub>2</sub>CH<sub>2</sub>N(CH<sub>3</sub>)<sub>2</sub>-), 3.33 (t, *J* = 6.8Hz, 2H, -CH<sub>2</sub>CH<sub>2</sub>O-), 3.23 (s, 6H, -N(CH<sub>3</sub>)<sub>2</sub>-), 2.06 (t, *J* = 7.2Hz, 2H, -SCH<sub>2</sub>-), 1.51-1.42 (p, *J* = 6.8Hz, 2H, -CH<sub>2</sub>CH<sub>2</sub>O-), 1.36-1.28 (p, *J* = 7.6Hz, 2H, -SCH<sub>2</sub>CH<sub>2</sub>-) 1.24-1.08 (m, 14H, -(CH<sub>2</sub>)<sub>7</sub>CH<sub>2</sub>CH<sub>2</sub>O-).

**Synthesis of compound 6:** An excess of trifluoroacetic acid (TFA, 20 equivalents, 3.69 g, 2.5 mL, 32.4 mmol) was added to compound 5 (1.2 g, 1.62 mmol) in 10 mL dry DCM. The color of the solution turned yellow upon addition of TFA. Then, triisopropylsilane (TIPS, 3 equivalents, 0.77g, 1 mL, 4.86 mmol) was added to the reaction mixture. The reaction mixture was stirred for 12 hr under N<sub>2</sub> at room temperature. The solvent, most of TFA, and TIPS were evaporated under reduced pressure. The yellow residue was purified by repeated washing with hexane (10 mL, 4 times) and dried in high vacuum. The final product formation was quantitative and was confirmed by NMR spectroscopy.

**<sup>1</sup>H NMR (400 MHz, CDCl<sub>3</sub>, TMS) of Compound 6:** δ 7.57-7.47 (m, 5H), 4.61 (s, 2H, -CH<sub>2</sub>-C<sub>6</sub>H<sub>5</sub>), 4.01 (s, br, 2H, -OCH<sub>2</sub>CH<sub>2</sub>N(CH<sub>3</sub>)<sub>2</sub>-), 3.74-3.48 (m, 14H, -(OCH<sub>2</sub>CH<sub>2</sub>)<sub>3</sub>-



CH<sub>2</sub>CH<sub>2</sub>N(CH<sub>3</sub>)<sub>2</sub>-), 3.41 (t,  $J = 6.8\text{Hz}$ , 2H, -CH<sub>2</sub>CH<sub>2</sub>O-), 3.14 (s, 6H, -N(CH<sub>3</sub>)<sub>2</sub>-), 2.52 (q,  $J = 7.2\text{Hz}$ , HSCH<sub>2</sub>-), 1.65-1.48 (m, 4H, -CH<sub>2</sub>CH<sub>2</sub>O-, + HSCH<sub>2</sub>CH<sub>2</sub>-), 1.43-1.20 (m, 15H, -(CH<sub>2</sub>)<sub>7</sub>CH<sub>2</sub>CH<sub>2</sub>O- + HS-).

### ***1.2.5 Synthesis of benzyl-ligand protected gold nanoparticle (BenzNP)***

We followed two-step method for synthesizing **BenzNP**, where a gold nanoparticle core was synthesized followed by place-exchange with the ligand of interest. First, pentanethiol-coated AuNPs with core diameter ~2 nm were synthesized using the Brust-Schiffrin two-phase synthesis protocol<sup>7,8</sup>. Subsequently, Murray place-exchange<sup>9</sup> method was followed to obtain the benzyl-ligand protected AuNPs. Pentanethiol conjugated AuNPs (10 mg) and compound **6** (27 mg) was dissolved in a mixture of 5 mL dry DCM, and 1 mL methanol and stirred under nitrogen atmosphere for 72 hr at room temperature. Then, solvents were removed under reduced pressure and the resulting precipitate was washed with hexane (10 mL) three times and with DCM (10 mL) twice. Then the precipitate was dissolved in distilled water and dialyzed for 72 hr (membrane molecular weight cut-off =10,000) to remove excess ligands, pentanethiol, acetic acid, and other salts present in the nanoparticle solution. After dialysis, the particle was lyophilized to yield a solid brownish product. The particles were then redispersed in deionized water (Milli-Q, Millipore). <sup>1</sup>H NMR-spectra in D<sub>2</sub>O showed substantial broadening of the proton peaks with no sign of free ligands. The particle was further characterized by transmission electron microscopy, MALDI-MS, and DLS (Supplementary Fig. 1, 2, and 3, respectively).

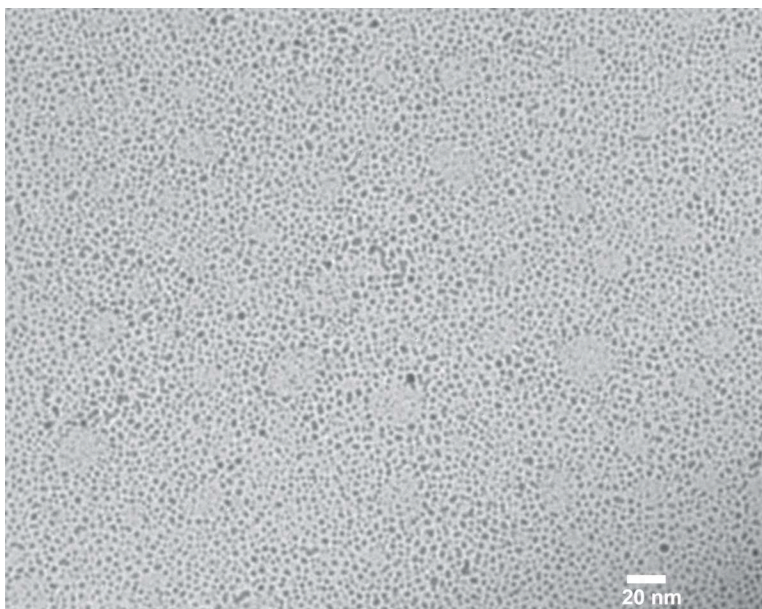

**Supplementary Figure 1. Transmission electron micrograph of BenzNP.**

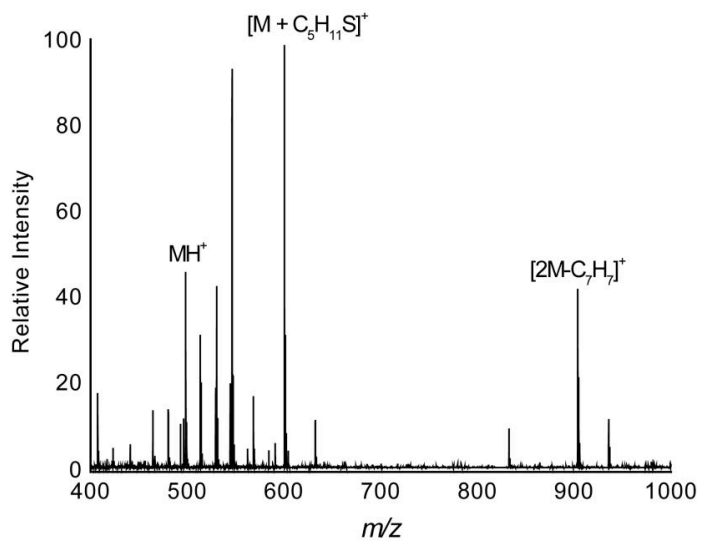

**Supplementary Figure 2. MALDI-MS spectrum of BenzNP.** The molecular ion (MH<sup>+</sup>,  $m/z$  =498) was detected, and the disulfide ion formed by the benzyl ligand and the original pentanethiol was also detected at  $m/z$  600.

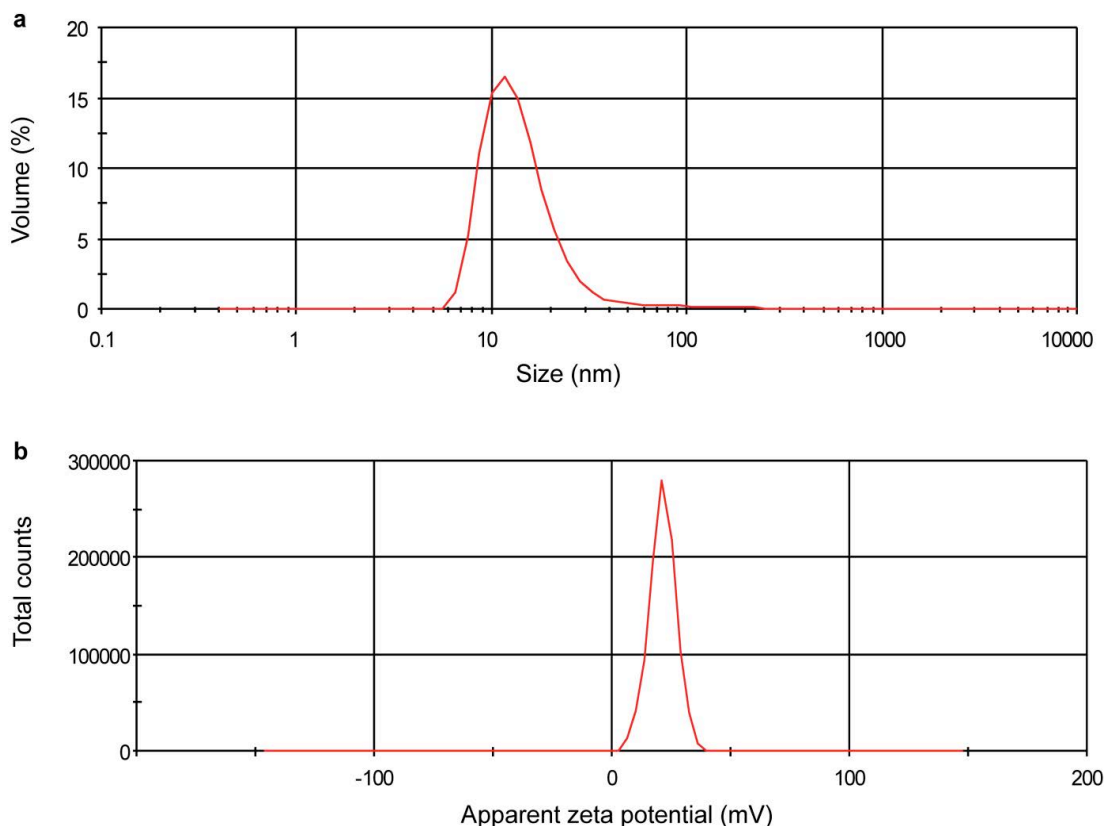

**Supplementary Figure 3. Characterization of BenzNP.** (a) Size (diameter) of **BenzNP** was measured by DLS from three independent experiments. The hydrodynamic diameter of the **BenzNP** is  $17.6 \pm 1.2$  nm. (b) Zeta potential of **BenzNP** was measured by DLS. The overall charge of **BenzNP** is measured as  $25.5 \pm 1$  mV from three independent replicates.

## Section 2: Sensor Fabrication

**2.1 Fluorescence titrations.** In the fluorescence quenching experiment, an equimolar solution of the three FPs (100 nM each) was titrated with various concentrations of **BenzNP** ranging from 0 to 300 nM. The excitation/emission/cut-off wavelengths were 380/450/435, 475/510/495, and 550/585/570 nm for EBFP2, EGFP and tdTomato, respectively. The change of fluorescence intensity at the respective emission maxima was recorded on a Molecular Devices SpectraMax M3 microplate reader at 25 °C. Decay of fluorescence intensity of each FP was observed with

increasing NP concentration. Nonlinear least-squares curve fitting analysis was employed to estimate the binding constant ( $K_a$ ) and association stoichiometry ( $n$ ) using a 1:1 binding model<sup>10,11</sup>.

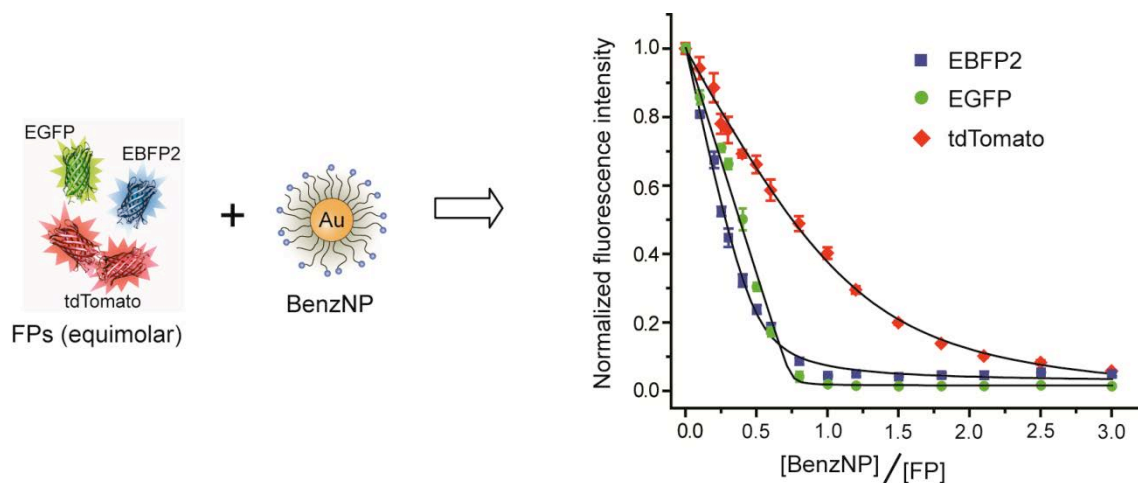

**Supplementary Figure 4. Titration of FPs with BenzNP.** Fluorescence titration of an equimolar mixture of the three FPs by **BenzNP**. The emissions for each FP were measured independently at the corresponding emission wavelengths. The data points are averages of three replicates and the error bars represent the standard deviations. The black solid lines through the data points represent the best curve fitting using the model of single set of identical binding sites.

**Supplementary Table 1.** Binding parameters for the **BenzNP**-FP complexes as determined by the fitting of the fluorescence titration curves.

| Protein  | Binding constant ( $K_a$ ), $M^{-1}$ | Binding ratio ( $n$ ) | $R^2$   |
|----------|--------------------------------------|-----------------------|---------|
| EBFP2    | $(1.66 \pm 0.5) \times 10^8$         | $2.0 \pm 0.09$        | 0.99641 |
| EGFP     | $(9.26 \pm 2.8) \times 10^9$         | $1.3 \pm 0.03$        | 0.99508 |
| tdTomato | $(6.69 \pm 2.6) \times 10^7$         | $0.8 \pm 0.04$        | 0.99678 |

**2.2 Sensor preparation:** First, a FP solution was prepared by mixing the FPs at the final concentration of 100 nM (for each FP). The **BenzNP**-FP sensor was generated by incubating the

FP solution with **BenzNP** (at the final concentration of 150 nM) for 30 min in 5 mM sodium phosphate buffer (pH 7.4). The FP and **BenzNP**-FP solutions were maintained in the dark to minimize photobleaching of the FPs, if any. This conjugate was then added to the drug-treated cells for screening studies.

### **Section 3: Drug Screening**

**3.1 Cell culture.** BT549 cell line was purchased from ATCC (ATCC<sup>®</sup> HTB-122<sup>™</sup>). pTD cell line<sup>12</sup> was generously donated by Prof. D. Josph Jerry. BT549 cells were cultured in DMEM media supplemented with 10% FBS and 1% antibiotics. Cells were grown in a humidified atmosphere containing 5% CO<sub>2</sub> at 37<sup>0</sup>C. The TD cells were cultured in DMEM high glucose media supplemented with 10% FBS and 1% antibiotics. At ~80% confluence, cells were trypsinized and plated in 96-well plates (Greiner black-and-clear bottom) and cultured for the next studies.

**3.2 IC<sub>50</sub> of the drugs.** The IC<sub>50</sub> values of the drugs were determined by alamar blue assay. Cells were seeded at 10,000 (for BT549 cells) or 15,000 (for pTD cells) cells/well in 96-well microplates (Greiner black-and-clear bottom). After 24 hours, the cells were washed twice with phosphate buffered saline (PBS) and treated with the drugs at different concentrations. The drug treatment was continued for 24 hours for all the drugs except hydrogen peroxide and sodium nitroprusside for which a 5 hour treatment was effective. Drug treatment was done in cell culture media lacking antibiotics. After the drug treatments, cells were washed with PBS twice and the percentage cell viability was determined by using Alamar blue assay following the manufacturer's protocol (Invitrogen). The IC<sub>50</sub> values were determined by fitting the data using a

dose response model with variable Hill slope built in OriginPro version 8.5 (Supplementary Fig. 5, and Supplementary Table 3 – 4).

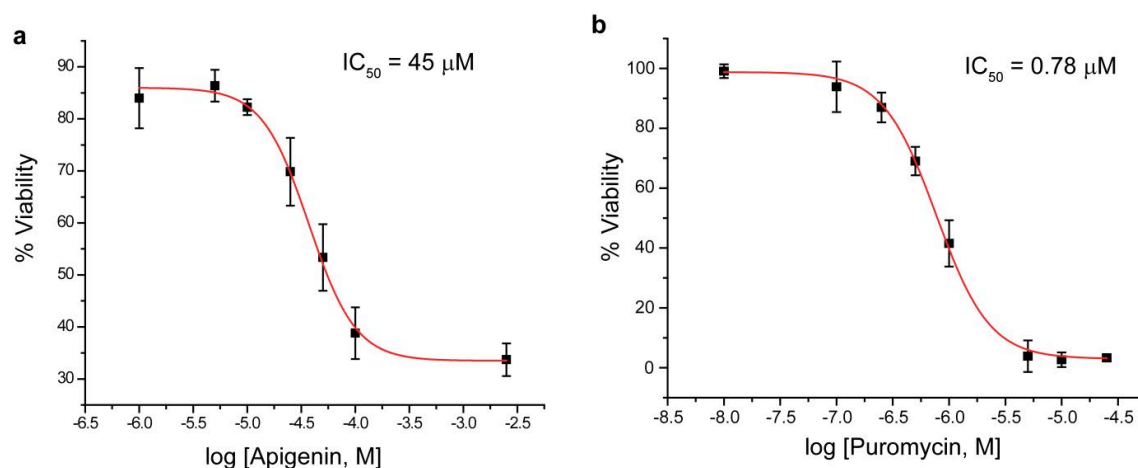

**Supplementary Figure 5. Determination of  $IC_{50}$  value of the single cytotoxic compounds.**

Representative dose response curves of **a**, apigenin, and **b**, puromycin using 10,000 BT549 cells after 24 hours of drug treatment. The  $IC_{50}$  values were determined by fitting the data (the red line) using dose response model with variable Hill slope built in Origin 8.5 program.

**Supplementary Table 2. Concentrations used for determining the  $IC_{50}$  values of PUR-CSP combinations.** The concentrations were the same for combinations of PUR-APG and APG-CSP.

| Total drug conc. ( $\mu M$ ) |                 | 0 | 0.01   | 0.5   | 1    | 5    | 10  | 25    | 50   | 100 | 250   | 500 |
|------------------------------|-----------------|---|--------|-------|------|------|-----|-------|------|-----|-------|-----|
| PUR-CSP (1:1)                | PUR ( $\mu M$ ) | 0 | 0.005  | 0.25  | 0.5  | 2.5  | 5   | 12.5  | 25   | 50  | 125   | 250 |
|                              | CSP ( $\mu M$ ) | 0 | 0.005  | 0.25  | 0.5  | 2.5  | 5   | 12.5  | 25   | 50  | 125   | 250 |
| PUR-CSP (1:3)                | PUR ( $\mu M$ ) | 0 | 0.0025 | 0.125 | 0.25 | 1.25 | 2.5 | 6.25  | 12.5 | 25  | 62.5  | 125 |
|                              | CSP ( $\mu M$ ) | 0 | 0.0075 | 0.375 | 0.75 | 3.75 | 7.5 | 18.75 | 37.5 | 75  | 187.5 | 375 |
| PUR-CSP (3:1)                | PUR ( $\mu M$ ) | 0 | 0.0075 | 0.375 | 0.75 | 3.75 | 7.5 | 18.75 | 37.5 | 75  | 187.5 | 375 |
|                              | CSP ( $\mu M$ ) | 0 | 0.0025 | 0.125 | 0.25 | 1.25 | 2.5 | 6.25  | 12.5 | 25  | 62.5  | 125 |

Dose response studies for combination of drugs were followed in a similar method of single drug. Three drugs (puromycin (PUR), cisplatin (CSP), and apigenin (APG)) were chosen arbitrarily to study the drug combinations (Fig. 4). To determine the  $IC_{50}$  values, two drugs of a

combination were added to confluent cells one by one at 1:1, 1:3, and 3:1 ratios with varying concentrations (Supplementary Table 2). The concentrations of drugs used were same for all the different combinations (PUR-CSP, PUR-APG, and APG-CSP). The  $IC_{50}$  values were determined by fitting the data using the same dose response model (Supplementary Fig. 6 and Supplementary Table 5).

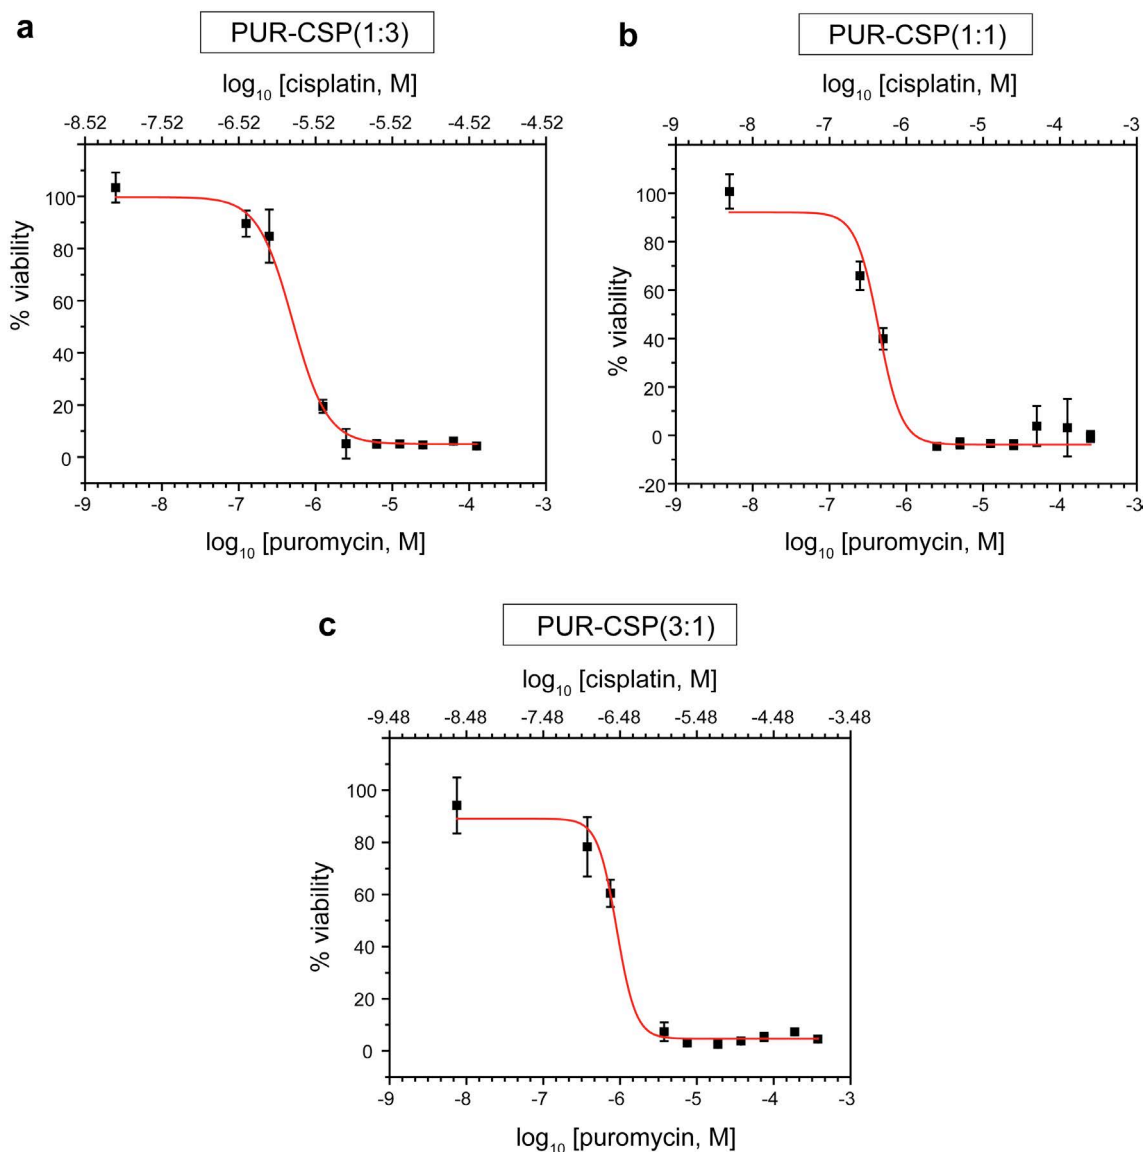

**Supplementary Figure 6. Determination of  $IC_{50}$  value of the combination of drugs.** Representative dose response curves of the drug combinations **a**, PUR-CSP(1:3), **b**, PUR-

CSP(1:1), and c, PUR-CSP(3:1) using 10,000 BT549 cells after 24 hours of drug treatment. The  $IC_{50}$  values were determined by fitting the data (the red line) using dose response model with variable Hill slope built in Origin 8.5 program. The  $IC_{50}$  concentrations are reported in Supplementary Table 5.

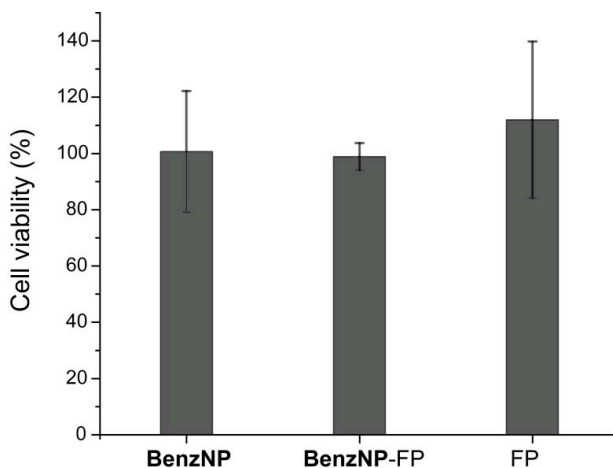

**Supplementary Figure 7. Cell viability of the sensor elements.** Cell viability was determined using alamar blue assay after incubating 10,000 BT549 cells with **BenzNP**, **BenzNP-FP**, and only FP for 15 minutes.

**3.3 Drug screening studies.** The drugs were purchased from VWR International, Sigma-Aldrich, and Tocris Bioscience. First, 10,000 (for BT549 cells) or 15,000 (for pTD cells) cells/well were seeded in 96-well Greiner black-and-clear bottom microplates and allowed to grow in their respective culture media at 37°C and 5% CO<sub>2</sub> for 24 hours. Then, cells were washed twice with PBS and treated with the drugs at their respective  $IC_{50}$  values (Supplementary Table 2, 3, and 5). The drug treatment was continued for 24 hours for the individual drugs as well as their combinations (except for hydrogen peroxide and sodium nitroprusside, which were treated for 5 hours). Cells were then washed three times with PBS and incubated with the sensor for 15 minutes before taking the reading.



Then, 200  $\mu$ L of the **BenzNP-FP** conjugate was loaded into 96-well plates containing drug treated cells to be analyzed. After 15 mins of incubation with the sensor, fluorescence intensities were monitored for each FP using a plate reader (Molecular Device Spectramax M3) at 25°C. Appropriate filters were used to collect emissions from each FP. The excitation/emission/cut-off wavelengths were 380/450/435, 475/510/495, and 550/585/570 nm for EBFP2, EGFP and tdTomato, respectively. Fluorescence responses were log<sub>2</sub>-transformed (Supplementary Table 7 – 12) before employing the statistical analyses.

**Supplementary Table 3. Description of the test compounds screened in the study using BT549 cell line.**

\* denotes the drugs that were included in the reference set.

|   | <b>Drug name</b>  | <b>Drug mechanism</b>       | <b>Drug target(s)</b> | <b>Drug type</b> | <b>Drug class</b>       | <b>IC<sub>50</sub> (<math>\mu</math>M)</b> | <b>Pubchem ID</b> |
|---|-------------------|-----------------------------|-----------------------|------------------|-------------------------|--------------------------------------------|-------------------|
| 1 | Daunorubicin HCl* | topoisomerase II inhibition | topoisomerase II      | small molecule   | chemo-therapeutic       | 1.7                                        | 30323             |
| 2 | Etoposide*        | topoisomerase II inhibition | topoisomerase II      | small molecule   | chemo-therapeutic       | 90                                         | 36462             |
| 3 | Apigenin          | topoisomerase II inhibition | topoisomerase II      | natural product  | in clinical development | 45                                         | 5280443           |
| 4 | Doxorubicin HCl*  | topoisomerase II inhibition | topoisomerase II      | small molecule   | chemo-therapeutic       | 7                                          | 31703             |
| 5 | 6-Thioguanine*    | DNA methylation memetic     | DNA methylation       | small molecule   | experimental            | 250                                        | 2723601           |
| 6 | Temozolomide*     | DNA methylation             | DNA methylation       | small molecule   | chemo-therapeutic       | 120                                        | 5394              |
| 7 | Thio-TEPA         | DNA alkylation              | DNA alkylation        | small molecule   | chemo-therapeutic       | 180                                        | 5453              |
| 8 | Cisplatin*        | DNA crosslinking            | DNA crosslinking      | small molecule   | chemo-therapeutic       | 86                                         | 5702198           |
| 9 | Oxaliplatin       | DNA crosslinking            | DNA crosslinking      | small molecule   | chemo-therapeutic       | 140                                        | 5310940           |

|    |                       |                              |                  |                 |                         |       |          |
|----|-----------------------|------------------------------|------------------|-----------------|-------------------------|-------|----------|
| 10 | Chlorambucil*         | DNA crosslinking             | DNA crosslinking | small molecule  | chemo-therapeutic       | 605   | 2708     |
| 11 | Paclitaxel            | disruption of mitosis        | microtubules     | natural product | chemo-therapeutic       | 0.012 | 36314    |
| 12 | Vinblastin sulfate*   | disruption of mitosis        | microtubules     | natural product | chemo-therapeutic       | 0.012 | 6710780  |
| 13 | Vincristine sulfate*  | disruption of mitosis        | microtubules     | natural product | chemo-therapeutic       | 0.01  | 249332   |
| 14 | Anisomycin            | protein synthesis inhibition | antibiotic       | natural product | experimental            | 0.4   | 253602   |
| 15 | Emetine               | protein synthesis inhibition | antibiotic       | natural product | clinical                | 0.2   | 10219    |
| 16 | Puromycin             | protein synthesis inhibition | antibiotic       | natural product | experimental            | 0.78  | 439530   |
| 17 | Roscovitine*          | CDK inhibition               | CDKs             | small molecule  | in clinical development | 0.06  | 160355   |
| 18 | Purvalanol A          | CDK inhibition               | CDKs             | small molecule  | experimental            | 4.64  | 456214   |
| 19 | Olomoucine*           | CDK inhibition               | CDKs             | small molecule  | experimental            | 117   | 4592     |
| 20 | Apicidin*             | HDAC inhibition              | HDAC             | natural product | experimental            | 7     | 15489645 |
| 21 | Vorinostat*           | HDAC inhibition              | HDAC             | small molecule  | clinical                | 160   | 5311     |
| 22 | Scriptaid             | HDAC inhibition              | HDAC             | small molecule  | experimental            | 19    | 5186     |
| 23 | Hydrogen peroxide*    | necrosis                     | necrotic         | small molecule  | experimental            | 480   | 784      |
| 24 | Sodium nitroprusside* | necrosis                     | necrotic         | small molecule  | experimental            | 450   | 11963622 |
| 25 | $\beta$ -lapachone    | necrosis                     | necrotic         | small molecule  | in clinical development | 0.65  | 3885     |
| 26 | ALLN                  | protein degradation          | proteasome       | small molecule  | experimental            | 7.1   | 4332     |
| 27 | MG-132                | protein degradation          | proteasome       | small molecule  | experimental            | 0.8   | 462382   |
| 28 | Irinotecan            | topoisomerase I inhibition   | topoisomerase I  | small molecule  | chemo-therapeutic       | 20    | 60838    |
| 29 | Topotecan             | topoisomerase I inhibition   | topoisomerase I  | small molecule  | chemo-therapeutic       | 52    | 60700    |

CDK: cyclin-dependent kinase; HDAC: histone deacetylase

**Supplementary Table 4. Description of the chemotherapeutic candidates screened in the study using pTD cell line.**

|    | <b>Drug name</b>     | <b>Drug mechanism</b>             | <b>Drug target(s)</b>  | <b>Drug type</b> | <b>Drug class</b> | <b>IC<sub>50</sub> (μM)</b> | <b>Pubchem ID</b> |
|----|----------------------|-----------------------------------|------------------------|------------------|-------------------|-----------------------------|-------------------|
| 1  | Doxorubicin HCl      | Topoisomerase II inhibition       | Topoisomerase II       | Small molecule   | Chemo-therapeutic | 1                           | 31703             |
| 2  | Daunorubicin HCl     | Topoisomerase II inhibition       | Topoisomerase II       | Small molecule   | Chemo-therapeutic | 1.5                         | 30323             |
| 3  | 6-Thioguanine        | DNA methylation memetic           | DNA methylation        | small molecule   | experimental      | 5                           | 2723601           |
| 4  | Gemcitabine          | Nucleic acid synthesis inhibition | Nucleic acid synthesis | small molecule   | chemo-therapeutic | 0.09                        | 60750             |
| 5  | Cisplatin            | DNA crosslinking                  | DNA crosslinking       | small molecule   | chemo-therapeutic | 12                          | 5702198           |
| 6  | Chlorambucil         | DNA crosslinking                  | DNA crosslinking       | small molecule   | chemo-therapeutic | 250                         | 2708              |
| 7  | Carboplatin          | DNA crosslinking                  | DNA crosslinking       | small molecule   | chemo-therapeutic | 340                         | 10339178          |
| 8  | Paclitaxel           | disruption of mitosis             | microtubules           | natural product  | chemo-therapeutic | 5                           | 36314             |
| 9  | Vinblastin sulfate   | disruption of mitosis             | microtubules           | natural product  | chemo-therapeutic | 5                           | 6710780           |
| 10 | Vincristine sulfate  | disruption of mitosis             | microtubules           | natural product  | chemo-therapeutic | 1                           | 249332            |
| 11 | Hydrogen peroxide    | necrosis                          | necrotic               | small molecule   | experimental      | 100                         | 784               |
| 12 | Sodium nitroprusside | necrosis                          | necrotic               | small molecule   | experimental      | 500                         | 11963622          |
| 13 | Camptothecin         | topoisomerase I inhibition        | topoisomerase I        | natural product  | chemo-therapeutic | 1                           | 104842            |
| 14 | Irinotecan           | topoisomerase I inhibition        | topoisomerase I        | natural product  | chemo-therapeutic | 5                           | 60838             |

### Section 3: Determination of FICI

**Supplementary equation 1.** The fractional inhibitory concentration index (FICI) was calculated using the following equation<sup>13</sup> based on Loewe additivity<sup>14,15</sup>:

$$FICI = \frac{[A]_C}{[A]_E} + \frac{[B]_C}{[B]_E}$$

where,  $[A]_C$  and  $[B]_C$  are the concentrations of drug A and B in the combination associated with a particular level of effect, e.g.,  $IC_{50}$ , and  $[A]_E$  and  $[B]_E$  are the concentrations of A and B when used singly to produce the same level of effect.  $FICI < 1$  indicates synergism, while  $1 \leq FICI < 4$  indicates additivity, and  $FICI \geq 4$  indicates antagonism<sup>13</sup>.

**Supplementary Table 5. Fractional inhibitory concentration of drug candidates and their combinations using BT549 cells.** Cells were simultaneously treated with the drugs for 24 h at the ratios indicated (three replicates for each). Dose response curves for the individual drugs and the combinations were determined by Alamar blue assays and the  $IC_{50}$  concentrations were obtained from curve fitting. The FICI values of the drugs were calculated according to Supplementary Equation 1 using the  $IC_{50}$  values. The therapeutic activities were inferred from the conditions set in the equation.

| Drugs         | Concentration @ $IC_{50}$ of the combination ( $\mu M$ ) |        | FICI | Action      |
|---------------|----------------------------------------------------------|--------|------|-------------|
|               | Drug A                                                   | Drug B |      |             |
| APG           | 45                                                       | -      | N/A  | N/A         |
| CSP           | 86                                                       | -      | N/A  | N/A         |
| PUR           | 0.78                                                     | -      | N/A  | N/A         |
| APG-CSP (1:1) | 34.5                                                     | 34.5   | 1.17 | Additive    |
| APG-CSP (1:3) | 15.5                                                     | 46.5   | 0.89 | Synergistic |
| APG-CSP (3:1) | 9                                                        | 3      | 0.23 | Synergistic |
| PUR-APG (1:1) | 0.65                                                     | 0.65   | 0.85 | Synergistic |
| PUR-APG (1:3) | 0.8                                                      | 2.4    | 1.08 | Additive    |
| PUR-APG (3:1) | 0.6                                                      | 0.2    | 0.77 | Synergistic |
| PUR-CSP (1:1) | 0.4                                                      | 0.4    | 0.52 | Synergistic |
| PUR-CSP (1:3) | 0.525                                                    | 1.575  | 0.69 | Synergistic |
| PUR-CSP (3:1) | 1.825                                                    | 0.275  | 1.06 | Additive    |

## Section 4: Statistical Methods

**4.1 Hierarchical clustering analysis.** Hierarchical clustering analysis (HCA) of the average data set was performed using the *hclust* function of the stats package of R assuming a complete linkage method<sup>16</sup>. *hclust* begins with each case serving as its own cluster; at each step in the clustering process, the two most similar cases or clusters are joined; the process iterates until all cases fall into a single cluster. HCA allows cases with mechanisms outside the reference set to be identified as novel, if they are dissimilar from the other cases in the set; in this case, they are linked to the other cases/clusters relatively high in the dendrogram.

**4.2 Linear discriminant analysis.** The raw fluorescence response data matrix was processed by classical linear discriminant analysis (LDA) using SYSTAT software (version 11.0, SystatSoftware, Richmond, CA, USA). In LDA, all variables were used in the model (complete mode) and the tolerance was set as 0.001. The raw fluorescence response patterns were transformed to canonical patterns where the ratio of between-class variance to the within-class variance was maximized, where the classes were defined as the drug mechanisms in the reference set. This defines the LDA solution space.

To identify the unknown (blinded) samples, we first re-ran LDA on the reference set using the *lda* function in the MASS package<sup>17</sup> of R; these results replicated the SYSTAT analysis. Predicted classifications for the blinded samples were then obtained using the *predict.lda* function that uses the fluorescence response patterns of each new case to compute the Mahalanobis distance of that case to the centroid of each mechanism cluster in the LDA solution space (Fig. 3b). Blinded cases are predicted to belong to the closest mechanism class, defined by the shortest Mahalanobis distance. Because some distance is always shortest, LDA is incapable of identifying blinded or completely unknown samples as having novel mechanisms. However,

by considering the expected distribution of Mahalanobis distances under these conditions, cases can be identified as outliers if they fall far from the closest centroid (i.e., have an associated  $p$ -value  $< 0.01$ ). Here, the distances are proportional to an  $F$  distribution<sup>18</sup>: for  $n$  cases overall,  $p$  dimensions in the LDA solution and Mahalanobis distances  $d^2$ ,

$$\frac{nd^2(n-p)}{p(n-1)(n+1)} \sim F(p, n-p).$$

**Supplementary Table 6. Leave-one-out analysis by Jackknifing in linear discriminant analysis. Each mechanism group contains drugs with 8 replicates as in the reference set.**

|       | I  | II | III | IV | V  | VI | VII | % correct |
|-------|----|----|-----|----|----|----|-----|-----------|
| I     | 16 | 0  | 0   | 0  | 0  | 0  | 0   | 100       |
| II    | 0  | 16 | 0   | 0  | 0  | 0  | 0   | 100       |
| III   | 0  | 0  | 24  | 0  | 0  | 0  | 0   | 100       |
| IV    | 0  | 0  | 0   | 15 | 0  | 1  | 0   | 94        |
| V     | 0  | 0  | 0   | 0  | 16 | 0  | 0   | 100       |
| VI    | 0  | 0  | 0   | 0  | 0  | 16 | 0   | 100       |
| VII   | 0  | 0  | 0   | 0  | 0  | 0  | 16  | 100       |
| Total | 16 | 16 | 16  | 15 | 16 | 17 | 16  | <b>99</b> |

I : disruption of mitosis (vinblastin sulfate, vincristine sulfate);

II : HDAC inhibition (apicidin, vorinostat);

III : topoisomerase II inhibition (daunorubicin HCl, etoposide, doxorubicin HCl);

IV : DNA methylation (6-thioguanine, temozolomide);

V : CDK inhibition (roscovitine, olomoucine);

VI : DNA crosslinking (cisplatin, chlorambucil);

VII : necrosis (sodium nitroprusside, hydrogen peroxide)

**4.3 Robustness of the classification approach.** Leave-one-out cross-validation using Jackknifed analysis on the reference set was performed (Supplementary Table 6) in SYSTAT to investigate the reliability of LDA approach for classifying the drugs. The analysis successively classifies all cases but one to develop a discriminant function and then categorizes the case that was left out.

This process is repeated with each case left out in turn. To assess the classification of unknown cases based on the shortest Mahalanobis distance, the distribution of all the distances was investigated. The distribution of squared Mahalanobis distances between each drug mechanism from the training set and blinded unknowns were plotted (Supplementary Fig. 8) as cumulative density functions (CDF) using the *cdfplot* function in StataSE 13. CDFs were also prepared for those drugs identified as novel mechanisms (Supplementary Fig. 9).

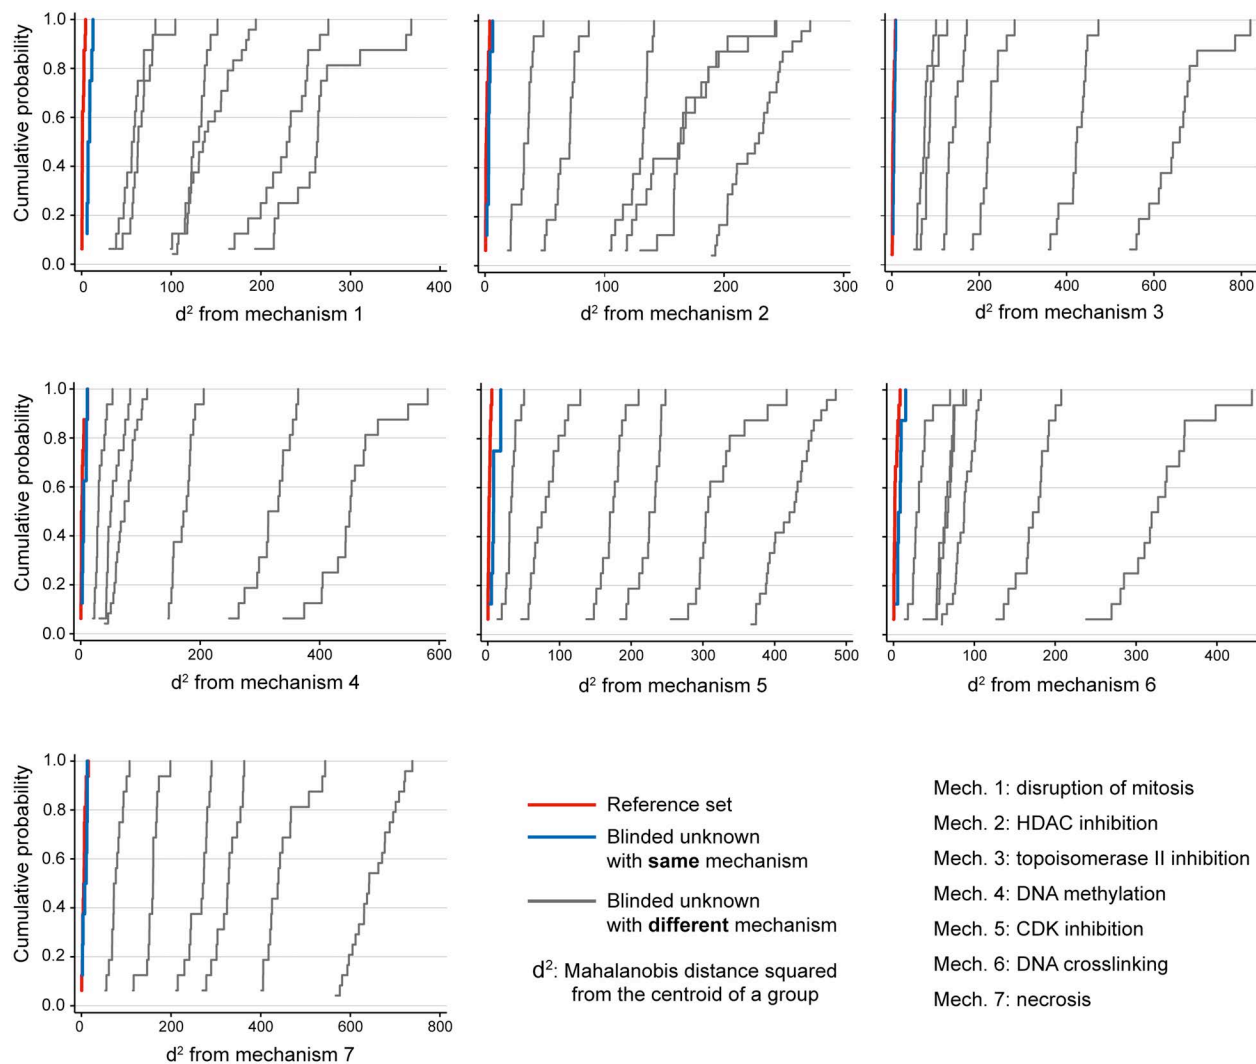

**Supplementary Figure 8. Cumulative density functions for the squared Mahalanobis distance between blinded unknowns and each mechanism from the reference set.**

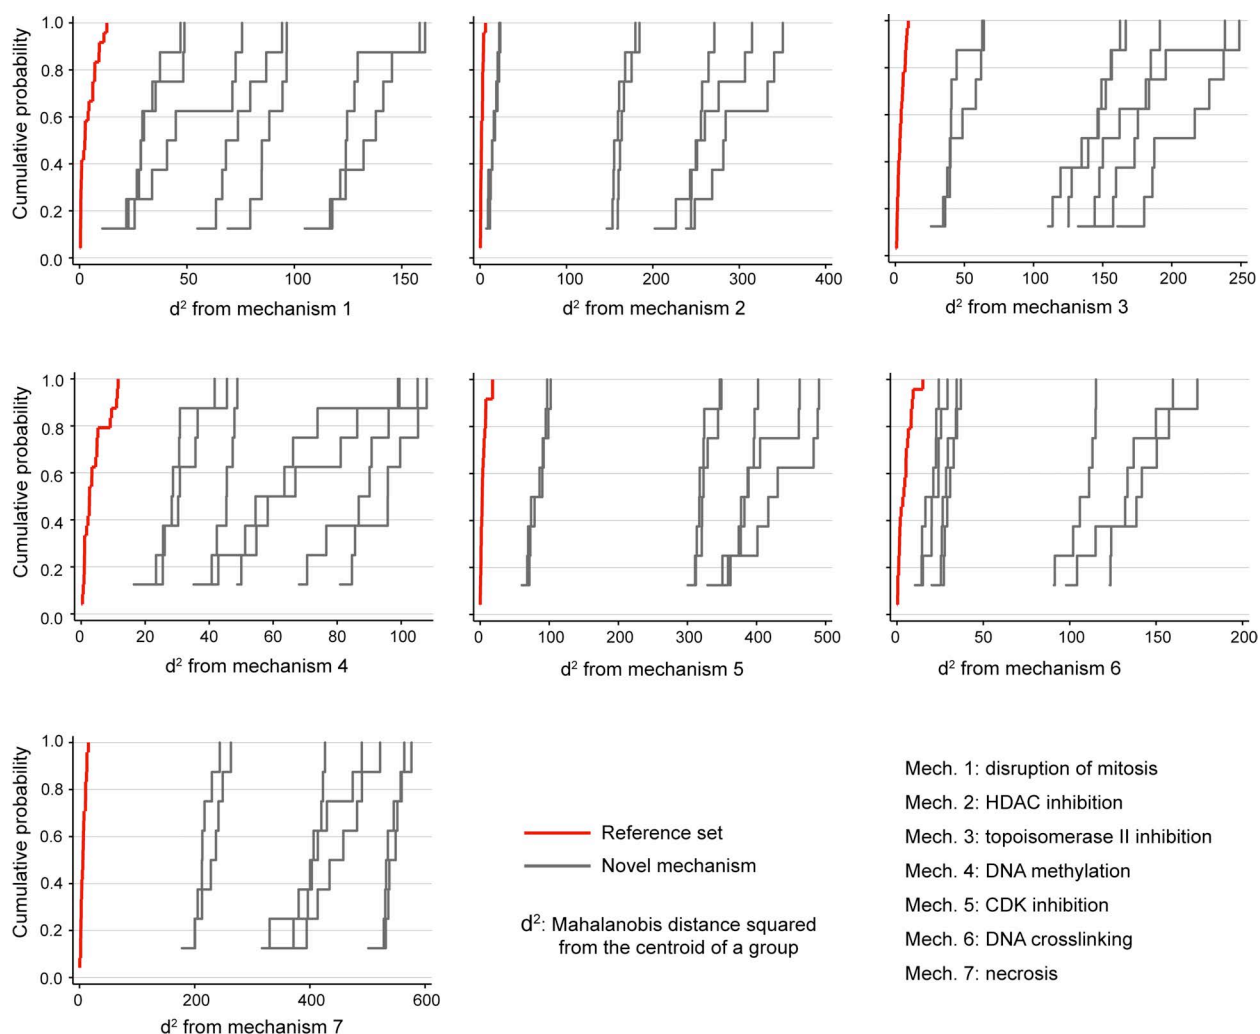

**Supplementary Figure 9. Cumulative density functions for the squared Mahalanobis distance between novel mechanisms and each mechanism from the reference set.**

It is observed that the distribution of the distances of the blinded unknowns from the reference set are clearly and considerably shorter for those drugs correctly identified as belonging to a given mechanism. Similarly, the large separation between novel mechanisms and each drug mechanism in the reference set further supports the use of the shortest Mahalanobis distance for correctly classifying unknown cases.



## Section 5: Validation of the Drug Screening Methodology

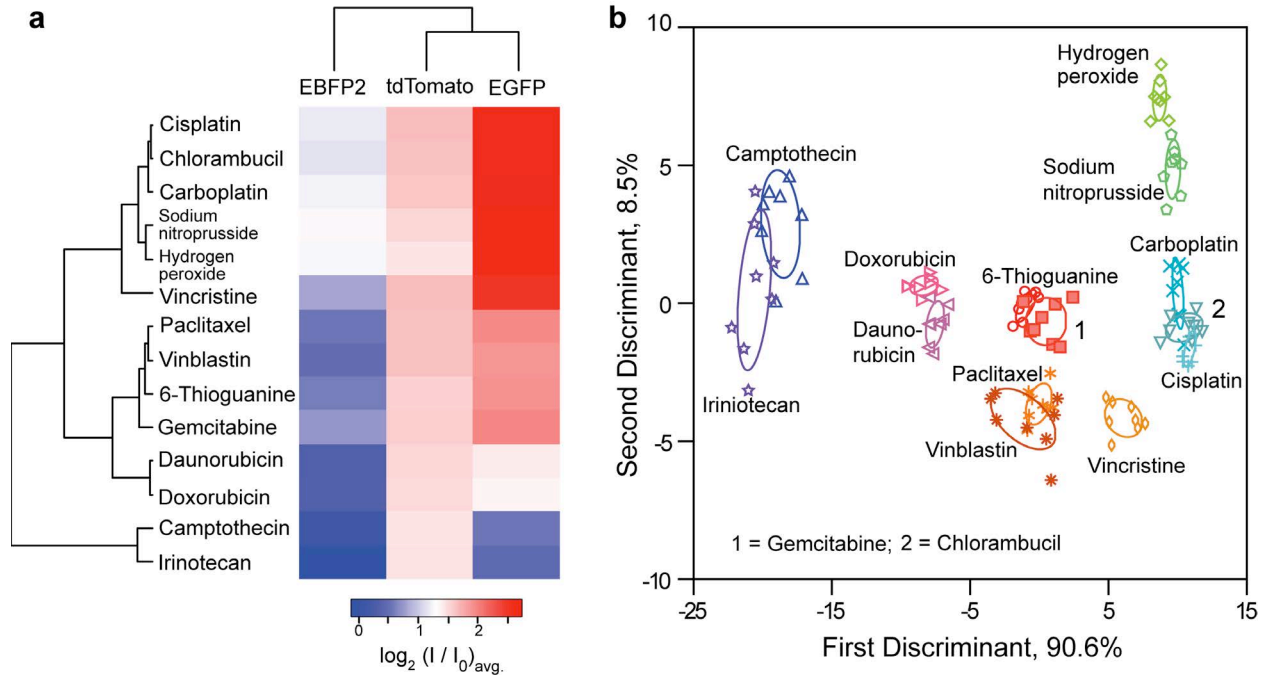

**Supplementary Figure 10. Drug screening using pTD cells.** **a**, Heat map of the fluorescence responses pTD cells when treated with 11 reference drugs, where  $I_0$  and  $I$  are respectively the fluorescence before and after the addition of the sensor to the cells. Agglomerative hierarchical analysis was performed on the averages of the fluorescence responses. The dendrogram shows degree of association. **b**, Linear discriminant analysis of the fluorescence responses resulted in canonical scores with three discriminants explaining 90.6, 8.5, and 0.9% of total variance and plotted with 95% confidence ellipses around the centroid of each group (based on the standard error of the mean).

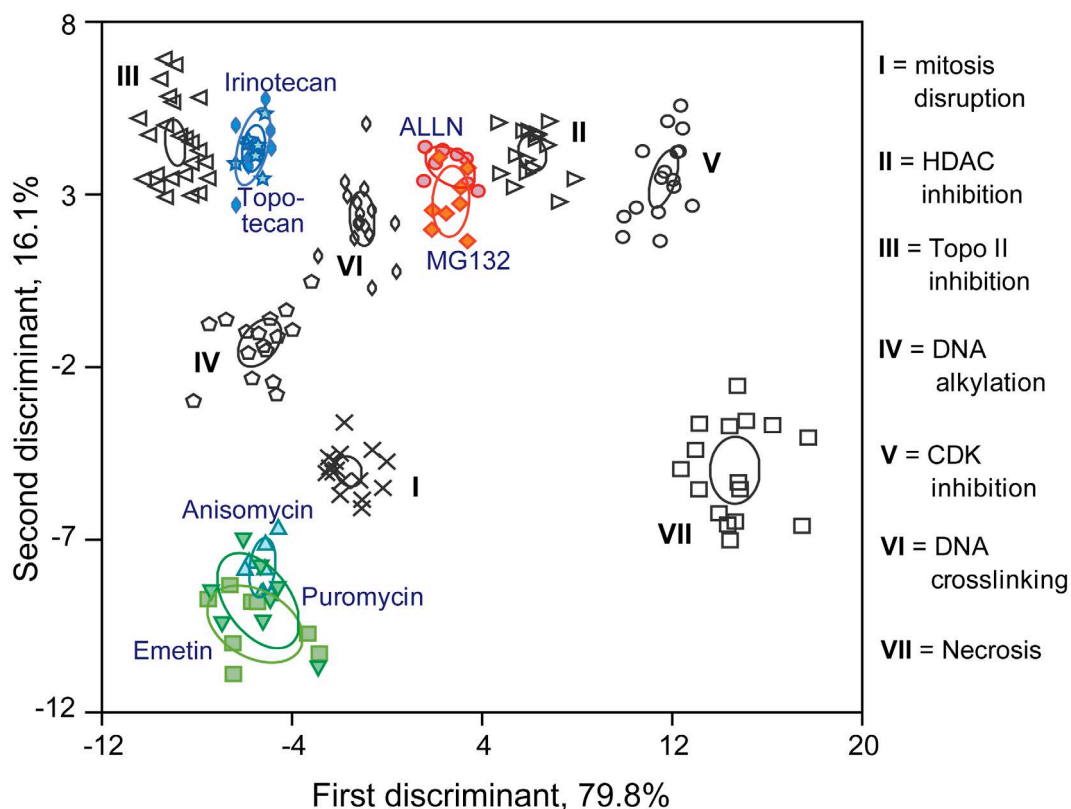

**Supplementary Figure 11. Classification of unknowns outside the initial reference set using BT549 cells.** Updated canonical score plot was derived from LDA of the fluorescence responses from a combination of the initial reference set and the compounds with ‘novel’ mechanisms, and were plotted with 95% confidence ellipses around the centroid of each group (based on the standard error of the mean). The clusters corresponding to the ‘novel’ compounds are colored, while the initial reference set compounds are presented in black.

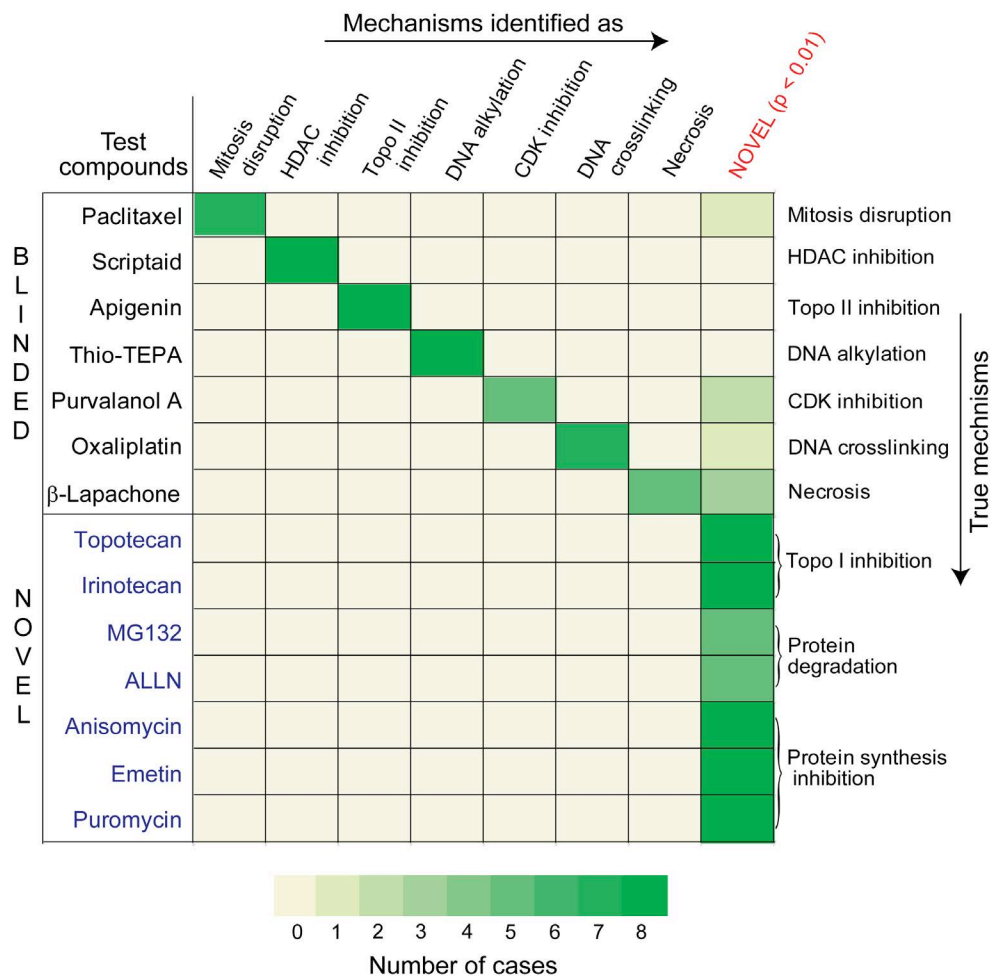

**Supplementary Figure 12. Prediction of drug mechanisms on parallel replicates using the triple-channel sensor.** Fluorescence responses from the EBFP2, EGFP, and tdTomato channels were utilized to perform the statistical analysis. The  $p$ -values were derived from  $F$ -distribution on the minimum Mahalanobis distance of each replicate to the centroid of reference groups calculated by LDA. Based on the  $p$ -values, each unknown case (parallel replicate) was assigned to a mechanistic group of the reference set or regarded as 'novel'. The blinded unknowns exhibit cell death mechanisms similar to the reference set, while the 'novel' unknowns involve mechanisms completely different from the reference set.

**Supplementary Table 7. Identification of unknowns using BT549 cells.** The average fluorescence responses ( $\log_2(I / I_0)_{\text{avg.}}$ ) of eight replicates for each drug was analyzed by LDA specifying the drug identities that are listed on top of the table (from known literature reported mechanisms). Using the shortest Mahalanobis distance of a case from the centroid of the reference groups,  $p$ -values were calculated. A threshold  $p$ -value of 0.01 determined if a test case was adjacent to a reference group. A  $p$ -values <0.01 was considered to be indicative of “novel” mechanism.

Identities: 1 = disruption of mitosis; 2 = HDAC inhibition; 3 = topoisomerase II inhibition; 4 = DNA alkylation; 5 = CDK inhibition; 6 = DNA crosslinking; 7 = necrosis; 8 = topoisomerase I inhibition; 9 = protein degradation; 10 = protein synthesis inhibition; where 8, 9, and 10 are the “novel” mechanistic groups.

| Drug name          | $\log_2(I / I_0)_{\text{avg.}}$ |          |          | Identity | Shortest Mahalanobis distance | $p$ -value | Correct prediction |
|--------------------|---------------------------------|----------|----------|----------|-------------------------------|------------|--------------------|
|                    | EBFP2                           | EGFP     | tdTomato |          |                               |            |                    |
| Paclitaxel         | 0.474453                        | 1.849425 | 0.885746 | 1        | 7.735                         | 0.06       | yes                |
| Scriptaid          | 1.32178                         | 2.295043 | 1.073868 | 2        | 1.234                         | 0.751      | yes                |
| Apigenin           | 0.391388                        | 1.2462   | 1.140723 | 3        | 4.332                         | 0.242      | yes                |
| ThioTEPA           | 0.674035                        | 0.937259 | 0.886101 | 4        | 4.357                         | 0.239      | yes                |
| Purvalanol         | 1.673927                        | 2.946799 | 0.993169 | 5        | 0.310                         | 0.959      | yes                |
| Oxaliplatin        | 0.940841                        | 1.226592 | 0.912785 | 6        | 6.314                         | 0.108      | yes                |
| $\beta$ -lapachone | 1.670123                        | 3.286734 | 0.812481 | 7        | 5.643                         | 0.143      | yes                |
| Topotecan          | 0.767481                        | 0.689949 | 1.05592  | 8        | 27.112                        | 2.24E-05   | yes                |
| Irinotecan         | 0.793319                        | 0.6301   | 1.053555 | 8        | 29.097                        | 1.03E-05   | yes                |
| MG-132             | 1.109934                        | 1.844122 | 1.005566 | 9        | 15.206                        | 0.0027     | yes                |
| ALLN               | 1.131745                        | 1.887931 | 1.036945 | 9        | 13.149                        | 0.0064     | yes                |
| Anisomycin         | 0.218229                        | 0.875206 | 0.718368 | 10       | 27.492                        | 1.93E-05   | yes                |
| Emetin             | 0.157169                        | 0.781786 | 0.668568 | 10       | 42.104                        | 7.75E-08   | yes                |
| Puromycin          | 0.123195                        | 0.958235 | 0.69852  | 10       | 28.856                        | 1.13E-05   | yes                |

**Supplementary Table 8. Identification of unknowns in parallel replicates using BT549 cells.**

The fluorescence responses ( $\log_2(I / I_0)$ ) for each drug were analyzed by LDA specifying the drug identities that are listed on top of the table (from known literature reported mechanisms). Using the shortest Mahalanobis distance of a case from the centroid of the reference groups,  $p$ -values were calculated. A threshold  $p$ -value of 0.01 determined if a test case was adjacent to a reference group. A  $p$ -value  $<0.01$  was considered to be indicative of “novel” mechanism.

Identities: 1 = disruption of mitosis; 2 = topoisomerase II inhibition; 3 = DNA alkylation; 4 = CDK inhibition; 5 = DNA crosslinking; 6 = HDAC inhibition; 7 = necrosis; 8 = topoisomerase I inhibition; 9 = protein degradation; 10 = protein synthesis inhibition; where 8, 9, and 10 are the “novel” mechanistic groups.

| Drug name  | $\log_2(I / I_0)$ |          |          | Identity | Shortest Mahalanobis distance | $p$ -value | Correct prediction |
|------------|-------------------|----------|----------|----------|-------------------------------|------------|--------------------|
|            | EBFP2             | EGFP     | tdTomato |          |                               |            |                    |
| Paclitaxel | 0.491266          | 1.796443 | 0.887812 | 1        | 7.1                           | 0.076      | yes                |
| Paclitaxel | 0.365477          | 1.808655 | 0.864452 | 1        | 6.2                           | 0.111      | yes                |
| Paclitaxel | 0.385263          | 1.814733 | 0.875243 | 1        | 7.1                           | 0.076      | yes                |
| Paclitaxel | 0.446601          | 1.875363 | 0.865041 | 1        | 6.1                           | 0.116      | yes                |
| Paclitaxel | 0.461191          | 1.946412 | 0.902585 | 1        | 12.7                          | 0.007      | No                 |
| Paclitaxel | 0.533706          | 1.894256 | 0.889528 | 1        | 9.2                           | 0.031      | yes                |
| Paclitaxel | 0.546818          | 1.910837 | 0.900947 | 1        | 11.3                          | 0.013      | yes                |
| Paclitaxel | 0.565304          | 1.748704 | 0.900357 | 1        | 7.1                           | 0.034      | yes                |
| Apigenin   | 0.331619          | 1.304964 | 1.114602 | 2        | 5.6                           | 0.143      | yes                |
| Apigenin   | 0.420706          | 1.137604 | 1.119796 | 2        | 2.9                           | 0.418      | yes                |
| Apigenin   | 0.44792           | 1.224268 | 1.135376 | 2        | 5                             | 0.182      | yes                |
| Apigenin   | 0.24857           | 1.297823 | 1.155536 | 2        | 7.1                           | 0.076      | yes                |
| Apigenin   | 0.419364          | 1.18311  | 1.118026 | 2        | 3.6                           | 0.319      | yes                |
| Apigenin   | 0.446214          | 1.086631 | 1.164061 | 2        | 4.2                           | 0.252      | yes                |
| Apigenin   | 0.415121          | 1.353842 | 1.153021 | 2        | 8.1                           | 0.050      | yes                |
| Apigenin   | 0.401591          | 1.381358 | 1.165363 | 2        | 9.4                           | 0.029      | yes                |
| ThioTEPA   | 0.649454          | 1.005823 | 0.915013 | 3        | 5                             | 0.182      | yes                |
| ThioTEPA   | 0.603823          | 0.870318 | 0.872034 | 3        | 2.6                           | 0.467      | yes                |

|                    |          |          |          |   |      |       |     |
|--------------------|----------|----------|----------|---|------|-------|-----|
| ThioTEPA           | 0.566806 | 0.823415 | 0.849746 | 3 | 3.3  | 0.358 | yes |
| ThioTEPA           | 0.71292  | 0.806894 | 0.870152 | 3 | 4.5  | 0.223 | yes |
| ThioTEPA           | 0.700991 | 1.071011 | 0.878436 | 3 | 9.5  | 0.028 | yes |
| ThioTEPA           | 0.748941 | 1.027028 | 0.887212 | 3 | 9.1  | 0.033 | yes |
| ThioTEPA           | 0.789018 | 1.047493 | 0.895043 | 3 | 10.1 | 0.021 | yes |
| ThioTEPA           | 0.620324 | 0.846092 | 0.921176 | 3 | 1.7  | 0.644 | yes |
| Purvalanol         | 1.354938 | 2.745812 | 0.891462 | 4 | 18.1 | 0.001 | No  |
| Purvalanol         | 1.450802 | 2.70905  | 0.950166 | 4 | 6.8  | 0.087 | yes |
| Purvalanol         | 1.918678 | 3.278762 | 0.964999 | 4 | 17.9 | 0.001 | No  |
| Purvalanol         | 1.812079 | 3.216549 | 1.069302 | 4 | 8.2  | 0.048 | yes |
| Purvalanol         | 1.766307 | 3.23665  | 1.069197 | 4 | 7.9  | 0.003 | yes |
| Purvalanol         | 1.87143  | 2.983716 | 1.026729 | 4 | 5.2  | 0.168 | yes |
| Purvalanol         | 1.681123 | 2.566447 | 0.945587 | 4 | 8.1  | 0.050 | yes |
| Purvalanol         | 1.536059 | 2.837409 | 1.027907 | 4 | 3.1  | 0.387 | yes |
| Oxalipatin         | 0.924969 | 1.039064 | 0.872682 | 5 | 15   | 0.003 | No  |
| Oxalipatin         | 0.790845 | 1.278069 | 0.904713 | 5 | 8.3  | 0.046 | yes |
| Oxalipatin         | 0.947535 | 1.082546 | 0.90256  | 5 | 8.9  | 0.036 | yes |
| Oxalipatin         | 0.90064  | 1.380151 | 0.92738  | 5 | 5.2  | 0.168 | yes |
| Oxalipatin         | 0.947591 | 1.209854 | 0.914206 | 5 | 6.2  | 0.111 | yes |
| Oxalipatin         | 0.976698 | 1.303735 | 0.92633  | 5 | 5.2  | 0.168 | yes |
| Oxalipatin         | 1.043034 | 1.273233 | 0.912292 | 5 | 9.4  | 0.029 | yes |
| Oxalipatin         | 0.995412 | 1.246088 | 0.942118 | 5 | 3.4  | 0.345 | yes |
| Scriptaid          | 1.318086 | 2.168859 | 1.084297 | 6 | 4    | 0.273 | yes |
| Scriptaid          | 1.29949  | 2.300914 | 1.097074 | 6 | 3.5  | 0.332 | yes |
| Scriptaid          | 1.232715 | 2.247992 | 1.052134 | 6 | 1.6  | 0.666 | yes |
| Scriptaid          | 1.233967 | 2.150199 | 1.049749 | 6 | 2.9  | 0.418 | yes |
| Scriptaid          | 1.358495 | 2.028866 | 1.058505 | 6 | 6.3  | 0.107 | yes |
| Scriptaid          | 1.341109 | 2.454851 | 1.097044 | 6 | 2.7  | 0.450 | yes |
| Scriptaid          | 1.439778 | 2.486418 | 1.086913 | 6 | 2.9  | 0.418 | yes |
| Scriptaid          | 1.350604 | 2.522249 | 1.065231 | 6 | 1.3  | 0.735 | yes |
| $\beta$ -lapachone | 1.635475 | 3.383322 | 0.792885 | 7 | 3.5  | 0.332 | yes |
| $\beta$ -lapachone | 1.688223 | 3.315771 | 0.856787 | 7 | 12   | 0.010 | No  |

|             |           |          |           |   |       |          |     |
|-------------|-----------|----------|-----------|---|-------|----------|-----|
| β-lapachone | 1.735551  | 3.367408 | 0.835724  | 7 | 10.6  | 0.017    | yes |
| β-lapachone | 1.81585   | 3.404662 | 0.801989  | 7 | 12.9  | 0.007    | No  |
| β-lapachone | 1.794584  | 3.359697 | 0.826125  | 7 | 12.8  | 0.007    | No  |
| β-lapachone | 1.593027  | 3.178195 | 0.784549  | 7 | 2.3   | 0.522    | yes |
| β-lapachone | 1.602053  | 3.275111 | 0.789168  | 7 | 2.1   | 0.560    | yes |
| β-lapachone | 1.496224  | 3.009709 | 0.812623  | 7 | 7.1   | 0.076    | yes |
| Topotecan   | 0.9124558 | 0.576372 | 1.0719014 | 8 | 34.55 | 8.12E-07 | yes |
| Topotecan   | 0.7450821 | 0.753095 | 1.0313165 | 8 | 19.71 | 0.0003   | yes |
| Topotecan   | 0.7804058 | 0.662567 | 1.0470668 | 8 | 26.11 | 2.5E-05  | yes |
| Topotecan   | 0.744172  | 0.711525 | 1.0671398 | 8 | 29.46 | 6.32E-06 | yes |
| Topotecan   | 0.6908895 | 0.80616  | 1.0702224 | 8 | 25.79 | 2.86E-05 | yes |
| Topotecan   | 0.7709816 | 0.713901 | 1.0576847 | 8 | 25.98 | 2.64E-05 | yes |
| Topotecan   | 0.7775269 | 0.723867 | 1.058921  | 8 | 25.43 | 3.31E-05 | yes |
| Topotecan   | 0.7183373 | 0.572104 | 1.0431048 | 8 | 25.51 | 3.2E-05  | yes |
| Irinotecan  | 0.9111066 | 0.626794 | 1.0873711 | 8 | 34.78 | 7.39E-07 | yes |
| Irinotecan  | 0.8906265 | 0.599745 | 1.0422428 | 8 | 27.15 | 1.63E-05 | yes |
| Irinotecan  | 0.6956894 | 0.514066 | 1.0048161 | 8 | 16.48 | 0.001    | yes |
| Irinotecan  | 0.9017144 | 0.612873 | 1.0581076 | 8 | 29.10 | 7.33E-06 | yes |
| Irinotecan  | 0.736761  | 0.681736 | 1.0498032 | 8 | 25.60 | 3.08E-05 | yes |
| Irinotecan  | 0.7294804 | 0.654143 | 1.0803982 | 8 | 32.83 | 1.62E-06 | yes |
| Irinotecan  | 0.7196964 | 0.697728 | 1.0441147 | 8 | 23.40 | 7.7E-05  | yes |
| Irinotecan  | 0.7614738 | 0.653716 | 1.0615859 | 8 | 30.32 | 4.46E-06 | yes |
| MG-132      | 1.1203962 | 1.820018 | 1.0453932 | 9 | 16.48 | 0.001    | yes |
| MG-132      | 1.1054221 | 1.92109  | 0.9707078 | 9 | 14.16 | 0.003804 | yes |
| MG-132      | 1.1020249 | 1.780509 | 0.9932195 | 9 | 14.50 | 0.003291 | yes |
| MG-132      | 1.0754434 | 1.707923 | 0.9966842 | 9 | 10.43 | 0.018    | No  |
| MG-132      | 1.0027647 | 1.810005 | 0.9880495 | 9 | 14.26 | 0.003644 | yes |
| MG-132      | 1.1234936 | 1.904117 | 1.0037248 | 9 | 12.33 | 0.008294 | yes |
| MG-132      | 1.2186177 | 1.869946 | 1.0275463 | 9 | 11.51 | 0.012    | No  |
| MG-132      | 1.1313061 | 1.939365 | 1.0192029 | 9 | 10.66 | 0.017    | No  |
| ALLN        | 0.9805836 | 1.919773 | 1.0380716 | 9 | 20.00 | 0.0003   | yes |
| ALLN        | 1.1916907 | 1.948941 | 1.0400151 | 9 | 9.10  | 0.032838 | No  |

|            |           |          |           |    |       |          |     |
|------------|-----------|----------|-----------|----|-------|----------|-----|
| ALLN       | 1.1731707 | 1.933821 | 1.0179614 | 9  | 9.66  | 0.025899 | No  |
| ALLN       | 1.1806511 | 2.009072 | 1.0121344 | 9  | 7.06  | 0.077671 | No  |
| ALLN       | 1.0311233 | 1.978185 | 1.0517562 | 9  | 15.86 | 0.002    | yes |
| ALLN       | 1.2060096 | 1.832213 | 1.0392453 | 9  | 13.83 | 0.004    | yes |
| ALLN       | 1.1914517 | 1.724505 | 1.0420311 | 9  | 15.07 | 0.002    | yes |
| ALLN       | 1.0992816 | 1.756937 | 1.0543426 | 9  | 13.80 | 0.004    | yes |
| Anisomycin | 0.2516905 | 0.823636 | 0.6897139 | 10 | 33.88 | 1.06E-06 | yes |
| Anisomycin | 0.1605141 | 0.886086 | 0.7305949 | 10 | 27.65 | 1.32E-05 | yes |
| Anisomycin | 0.2931441 | 0.648547 | 0.6834973 | 10 | 45.36 | 1.19E-08 | yes |
| Anisomycin | 0.1349607 | 0.882177 | 0.7263028 | 10 | 29.28 | 6.8E-06  | yes |
| Anisomycin | 0.2401371 | 0.853572 | 0.7160096 | 10 | 28.56 | 9.12E-06 | yes |
| Anisomycin | 0.2457637 | 0.915057 | 0.7403855 | 10 | 22.74 | 0.0001   | yes |
| Anisomycin | 0.2314582 | 0.767047 | 0.6913808 | 10 | 37.46 | 2.56E-07 | yes |
| Anisomycin | 0.1881663 | 1.225528 | 0.7690587 | 10 | 10.60 | 0.017    | No  |
| Emetin     | 0.1784104 | 1.330532 | 0.6540466 | 10 | 25.65 | 3.03E-05 | yes |
| Emetin     | 0.0967148 | 0.552381 | 0.6209228 | 10 | 71.12 | 1.02E-12 | yes |
| Emetin     | 0.1044868 | 0.744275 | 0.7090767 | 10 | 40.70 | 7.17E-08 | yes |
| Emetin     | 0.2097871 | 0.68772  | 0.681943  | 10 | 44.83 | 1.45E-08 | yes |
| Emetin     | 0.1624354 | 0.85505  | 0.6907236 | 10 | 33.77 | 1.11E-06 | yes |
| Emetin     | 0.1455794 | 0.383553 | 0.6822119 | 10 | 51.24 | 1.28E-09 | yes |
| Emetin     | 0.1858976 | 0.42808  | 0.6381867 | 10 | 66.97 | 4.32E-12 | yes |
| Emetin     | 0.1740443 | 1.272699 | 0.6714334 | 10 | 22.14 | 0.0001   | yes |
| Puromycin  | 0.1751438 | 0.848196 | 0.7471039 | 10 | 28.46 | 9.52E-06 | yes |
| Puromycin  | 0.0208932 | 0.744188 | 0.6800961 | 10 | 48.82 | 3.18E-09 | yes |
| Puromycin  | 0.2036239 | 0.892739 | 0.7204562 | 10 | 26.66 | 1.99E-05 | yes |
| Puromycin  | 0.1489318 | 0.887767 | 0.6735382 | 10 | 35.39 | 5.8E-07  | yes |
| Puromycin  | 0.0722521 | 1.200062 | 0.7097523 | 10 | 21.76 | 0.0001   | yes |
| Puromycin  | 0.1730335 | 1.083246 | 0.7083117 | 10 | 20.33 | 0.0002   | yes |
| Puromycin  | 0.0287076 | 0.697801 | 0.7081547 | 10 | 48.28 | 3.9E-09  | yes |
| Puromycin  | 0.1629762 | 1.311882 | 0.6407462 | 10 | 30.03 | 5.01E-06 | yes |



**Supplementary Table 9. Classification of drug combinations using *F*-distribution.** The fluorescence responses ( $\log_2(I / I_0)$ ) from the parallel replicates for each drug (using BT549 cells) were analyzed by LDA. The *p*-values were calculated using the shortest Mahalanobis distance of a case from the centroid of the reference mechanisms to which the single drug components of a combination belong to. A threshold *p*-value of 0.01 determined if a test case was adjacent to a single-drug reference mechanism (I, II, and III as defined below). A *p*-value <0.01 was considered to be indicative of “novel” mechanism.

Mechanisms: I = DNA crosslinking; II = Topo II inhibition; III = protein synthesis inhibition; IV = novel.

Drugs included in the reference set: I – cisplatin, oxaliplatin, and chlorambucil; II – daunorubicin, etoposide, doxorubicin, and apigenin; III – anisomycin, emetin, and puromycin (Note: including 4 drugs in the Topo II inhibition mechanism group had the same outcome as using 3 drugs)

| Drug name    | $\log_2(I / I_0)$ |          |          | Shortest Mahalanobis distance | <i>p</i> -value | Closest mechanism (cut-off <i>p</i> = 0.01) |
|--------------|-------------------|----------|----------|-------------------------------|-----------------|---------------------------------------------|
|              | EBFP2             | EGFP     | tdTomato |                               |                 |                                             |
| APG-CSP(1:3) | 0.955424          | 1.106008 | 1.065095 | 8.328646                      | 0.047357        | I                                           |
| APG-CSP(1:3) | 0.973441          | 1.146331 | 1.024337 | 3.079249                      | 0.393766        | I                                           |
| APG-CSP(1:3) | 0.958712          | 1.206851 | 1.068932 | 7.747769                      | 0.060277        | I                                           |
| APG-CSP(1:3) | 1.086559          | 1.295259 | 1.078068 | 9.934439                      | 0.024243        | I                                           |
| APG-CSP(1:3) | 1.010819          | 1.272161 | 1.057487 | 5.804262                      | 0.134095        | I                                           |
| APG-CSP(1:3) | 1.08917           | 1.315773 | 1.082389 | 10.49058                      | 0.019215        | I                                           |
| APG-CSP(1:3) | 1.043034          | 1.304583 | 1.081454 | 9.247516                      | 0.032295        | I                                           |
| APG-CSP(1:3) | 1.09638           | 1.359673 | 1.07246  | 9.221532                      | 0.032647        | I                                           |
| APG-CSP(3:1) | 1.019645          | 1.367773 | 1.059276 | 5.798637                      | 0.134402        | I                                           |
| APG-CSP(3:1) | 1.120779          | 1.481068 | 1.036317 | 6.94939                       | 0.083857        | I                                           |
| APG-CSP(3:1) | 1.124744          | 1.524248 | 1.032358 | 7.158451                      | 0.076926        | I                                           |
| APG-CSP(3:1) | 1.122181          | 1.525788 | 1.059937 | 9.07756                       | 0.034668        | I                                           |
| APG-CSP(3:1) | 1.131429          | 1.557854 | 1.118681 | 17.34528                      | 0.001106        | IV                                          |
| APG-CSP(3:1) | 1.238708          | 1.661483 | 1.056737 | 17.3487                       | 0.001104        | IV                                          |
| APG-CSP(3:1) | 1.175445          | 1.606648 | 1.116401 | 19.24833                      | 0.000505        | IV                                          |
| APG-CSP(3:1) | 1.133266          | 1.764256 | 1.097466 | 16.0868                       | 0.001862        | IV                                          |

|              |          |          |          |          |          |     |
|--------------|----------|----------|----------|----------|----------|-----|
| PUR-CSP(1:1) | -0.08615 | 1.622911 | 0.888862 | 50.80128 | 2.91E-09 | IV  |
| PUR-CSP(1:1) | 0.045809 | 1.085335 | 0.824777 | 15.86019 | 0.002045 | IV  |
| PUR-CSP(1:1) | 0.282299 | 0.933211 | 0.849196 | 15.8895  | 0.002021 | IV  |
| PUR-CSP(1:1) | 0.248663 | 1.370993 | 0.856552 | 18.06363 | 0.000822 | IV  |
| PUR-CSP(1:1) | 0.295679 | 1.064149 | 0.845494 | 14.82667 | 0.003143 | IV  |
| PUR-CSP(1:1) | 0.246915 | 0.939114 | 0.86624  | 18.94159 | 0.000573 | IV  |
| PUR-CSP(1:1) | 0.367902 | 1.21823  | 0.877871 | 23.49026 | 8.99E-05 | IV  |
| PUR-CSP(1:1) | 0.313811 | 1.178281 | 0.87533  | 21.08848 | 0.000238 | IV  |
| PUR-CSP(1:3) | 0.132131 | 0.81462  | 0.816707 | 11.42469 | 0.013002 | III |
| PUR-CSP(1:3) | 0.173898 | 0.822729 | 0.784728 | 5.812084 | 0.133668 | III |
| PUR-CSP(1:3) | 0.12376  | 0.854606 | 0.813764 | 10.79458 | 0.016921 | III |
| PUR-CSP(1:3) | 0.158445 | 0.882777 | 0.782024 | 5.256716 | 0.167431 | III |
| PUR-CSP(1:3) | 0.188832 | 1.110528 | 0.847513 | 14.76294 | 0.003227 | IV  |
| PUR-CSP(1:3) | 0.198981 | 0.889976 | 0.854416 | 16.8847  | 0.001338 | IV  |
| PUR-CSP(1:3) | 0.222699 | 1.165705 | 0.84713  | 14.54853 | 0.003529 | IV  |
| PUR-CSP(1:3) | 0.245328 | 0.982695 | 0.788376 | 5.695164 | 0.140181 | III |
| PUR-APG(1:1) | 0.729879 | 0.973113 | 0.675937 | 53.83391 | 1E-09    | IV  |
| PUR-APG(1:1) | 0.812728 | 1.22745  | 0.674566 | 55.89781 | 4.89E-10 | IV  |
| PUR-APG(1:1) | 0.591799 | 0.892395 | 0.703146 | 30.84083 | 4.87E-06 | IV  |
| PUR-APG(1:1) | 1.015348 | 0.891376 | 0.659702 | 64.25754 | 2.87E-11 | IV  |
| PUR-APG(1:1) | 0.712939 | 0.860641 | 0.740408 | 34.52504 | 1.17E-06 | IV  |
| PUR-APG(1:1) | 0.665525 | 1.118378 | 0.774402 | 30.29744 | 6.02E-06 | IV  |
| PUR-APG(1:1) | 0.796373 | 1.293681 | 0.753162 | 31.54274 | 3.71E-06 | IV  |
| PUR-APG(1:1) | 0.644193 | 1.19995  | 0.729385 | 37.98025 | 3.15E-07 | IV  |
| PUR-APG(3:1) | 0.352239 | 0.718765 | 0.62538  | 11.31612 | 0.013606 | III |
| PUR-APG(3:1) | 0.523196 | 0.829024 | 0.659261 | 24.7313  | 5.46E-05 | IV  |
| PUR-APG(3:1) | 0.448536 | 0.865448 | 0.614883 | 21.09229 | 0.000238 | IV  |
| PUR-APG(3:1) | 0.516575 | 0.620904 | 0.595459 | 33.79111 | 1.55E-06 | IV  |
| PUR-APG(3:1) | 0.370689 | 0.636177 | 0.669956 | 10.03931 | 0.023203 | III |
| PUR-APG(3:1) | 0.538742 | 0.500122 | 0.637354 | 33.15634 | 1.98E-06 | IV  |
| PUR-APG(3:1) | 0.501424 | 0.751816 | 0.661113 | 22.37575 | 0.000141 | IV  |
| PUR-APG(3:1) | 0.47177  | 0.754987 | 0.639533 | 20.88916 | 0.000258 | IV  |

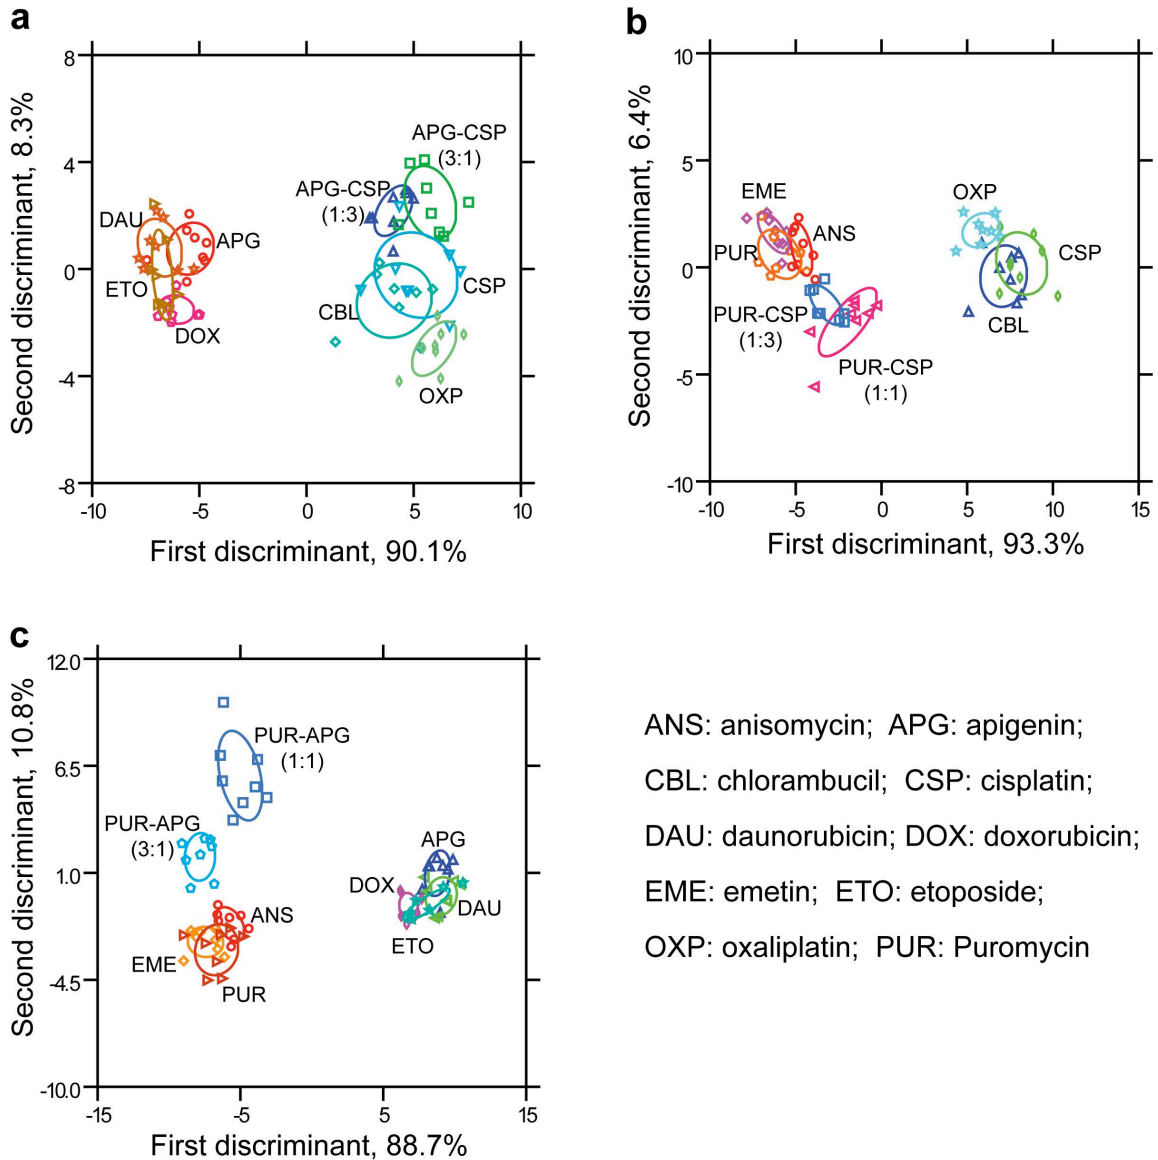

**Supplementary Figure 13. Categorizing the mechanisms of drug combinations.** BT549 Cells were treated with the drug combinations for 24 h at their corresponding  $IC_{50}$  concentrations. Canonical score plot of the synergistic combinations of **b**, apigenin-cisplatin, **c**, puromycin-cisplatin, and **d**, puromycin-apigenin were derived from LDA of the fluorescence responses and plotted with 95% confidence ellipses around the centroid of each group. The identities of individual drugs from the mechanistic groups, to which the drug components of the combinations belong to, were retained in the LDA analysis.

## Section 6: Discussions on the Importance of the Fluorescence Channels

It is worth examining the importance of the individual FP in the multi-channel sensor. We drug categorized the drugs as well as identified the unknowns using to investigate whether or not different FP pairs provide equivalent or better classification resolution than the triple-channel.

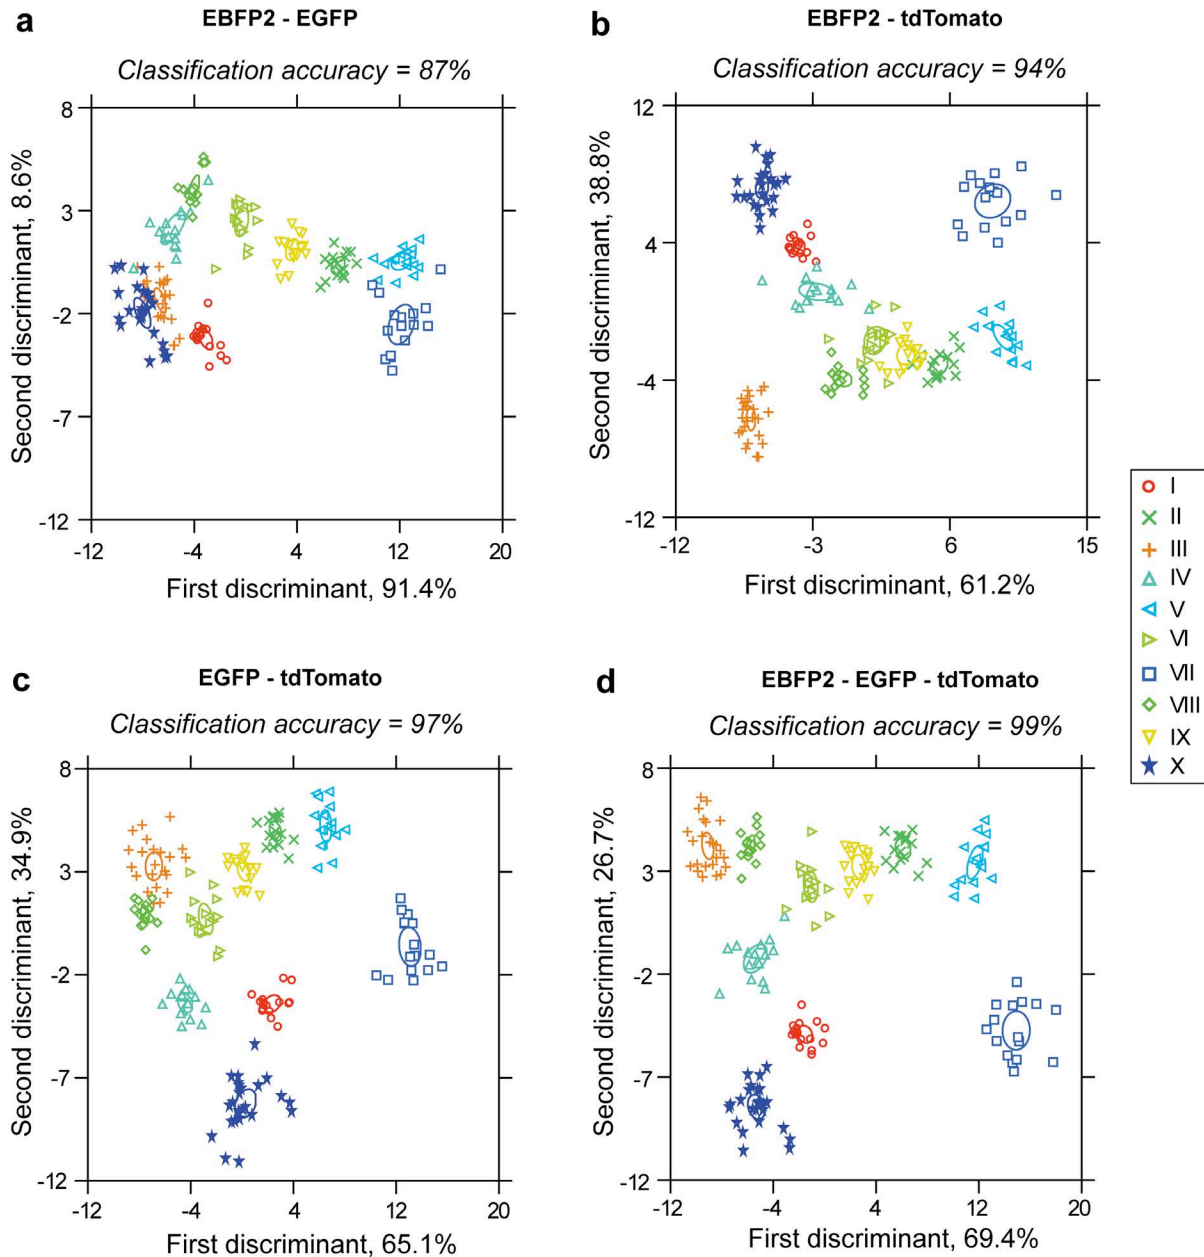

**Supplementary Figure 14. Significance of the FPs in categorizing the drug mechanisms using BT549 cells.** The canonical score plots were derived from LDA of the fluorescence responses

obtained from the FP combinations of **a**, EBFP2-EGFP, **b**, EBFP2-tdTomato, **c**, EGFP-tdTomato, and **d**, EBFP2-EGFP-tdTomato, and plotted with 95% confidence ellipses around the centroid of each group (based on the standard error of the mean). The Jackknifed classification accuracy is noted on the top of each plot. Identities: I= disruption of mitosis (vinblastine sulfate, vincristine sulfate); II= HDAC inhibition (apicidin, vorinostat); III= topoisomerase II inhibition (daunorubicin HCl, etoposide, doxorubicin HCl); IV= DNA alkylation (6-thioguanine, temozolomide); V= CDK inhibition (roscovitine, olomoucine); VI= DNA crosslinking (cisplatin, chlorambucil); VII= necrosis (sodium nitroprusside, hydrogen peroxide); VIII= topoisomerase I inhibition (topotecan, irinotecan); IX= protein degradation (MG-132, ALLN); X= protein synthesis inhibition (anisomycin, emetin, puromycin).

Apparently, the responses for tdTomato in the triple-channel sensor seem to vary slightly across the drug set (Fig. 3a and Supplementary Fig. 10). However, a systematic analysis of the fluorescence responses with and without tdTomato (Supplementary Fig. 14) demonstrates that this FP provides a significant contribution towards the overall categorization. Interestingly, tdTomato in combination with EGFP provided much higher classification accuracy (Jackknifed) than the EBFP2-EGFP pair (97% vs. 87%). Also, it is evident that the triple-channel combination categorized the reference set with the greatest classification accuracy. The high classification accuracy of the EGFP-tdTomato pair prompted us to further compare its ability to identify the blinded unknowns and ‘novel’ categories with the triple-channel combination (Supplementary Fig. 15 and Supplementary Table 10).

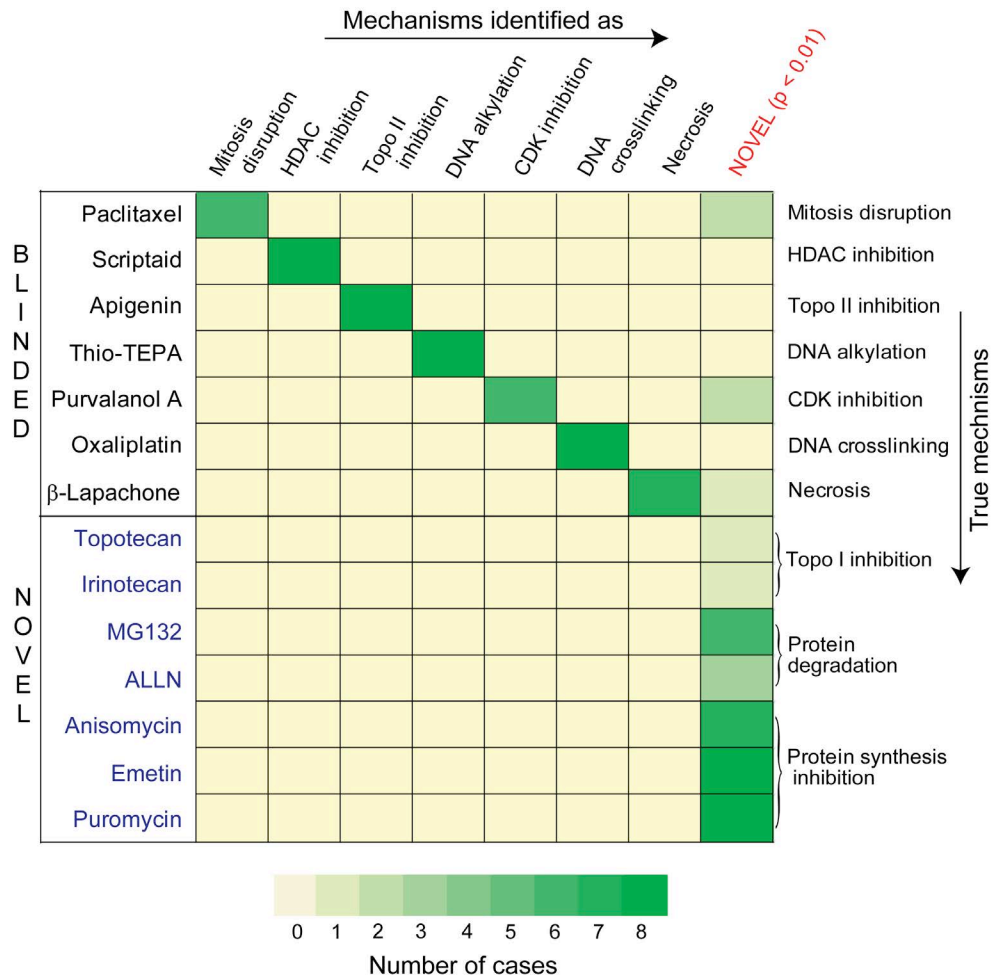

**Supplementary Figure 15. Prediction of drug mechanisms on parallel replicates using fluorescence responses from EGFP-tdTomato pair.** Fluorescence responses only from the EGFP, and tdTomato channels were utilized to perform the statistical analysis. The  $p$ -values were derived from  $F$ -distribution on the minimum Mahalanobis distance (derived from LDA) of each replicate to the centroid of reference groups. Based on the  $p$ -values, each unknown case (parallel replicate) was assigned to a reference mechanistic group or regarded as 'novel'. The blinded unknowns exhibits cell death mechanisms similar to the reference set, while the 'novel' unknowns involve mechanisms completely different from the reference set.

**Supplementary Table 10. Identification of unknowns using the EGFP-tdTomato channels only (BT549 cells).** The average fluorescence responses ( $\log_2(I / I_0)$ ) of eight replicates for each drug was analyzed by LDA specifying the drug identities that are listed on top of the table (from known literature reported mechanisms). A threshold  $p$ -value of 0.01 determined if test case was adjacent to a reference group or indicative of “novel” mechanism. **Compare table 7.**

Identities: 1 = disruption of mitosis; 2 = HDAC inhibition; 3 = topoisomerase II inhibition; 4 = DNA alkylation; 5 = CDK inhibition; 6 = DNA crosslinking; 7 = necrosis; 8 = topoisomerase I inhibition; 9 = protein degradation; 10 = protein synthesis inhibition; where 8, 9, and 10 are the “novel” mechanistic groups.

| Drug name          | $\log_2(I / I_0)$ |          | Identity | Shortest Mahalanobis distance | $p$ -value | Correct prediction |
|--------------------|-------------------|----------|----------|-------------------------------|------------|--------------------|
|                    | EGFP              | tdTomato |          |                               |            |                    |
| Paclitaxel         | 1.849425          | 0.885746 | 1        | 7.66                          | 0.024      | yes                |
| Scriptaid          | 2.295043          | 1.073868 | 2        | 1.22                          | 0.548      | yes                |
| Apigenin           | 1.2462            | 1.140723 | 3        | 3.91                          | 0.147      | yes                |
| ThioTEPA           | 0.937259          | 0.886101 | 4        | 3.11                          | 0.217      | yes                |
| Purvalanol         | 2.946799          | 0.993169 | 5        | 0.25                          | 0.881      | yes                |
| Oxaliplatin        | 1.226592          | 0.912785 | 6        | 5.82                          | 0.058      | yes                |
| $\beta$ -lapachone | 3.286734          | 0.812481 | 7        | 3.14                          | 0.214      | yes                |
| Topotecan          | 0.689949          | 1.05592  | 8        | 5.49                          | 0.068      | no                 |
| Irinotecan         | 0.6301            | 1.053555 | 8        | 7.13                          | 0.031      | no                 |
| MG-132             | 1.844122          | 1.005566 | 9        | 12.66                         | 0.002      | yes                |
| ALLN               | 1.887931          | 1.036945 | 9        | 10.51                         | 0.06       | no                 |
| Anisomycin         | 0.875206          | 0.718368 | 10       | 26.32                         | 5.3E-06    | yes                |
| Emetin             | 0.781786          | 0.668568 | 10       | 40.39                         | 1.5E-08    | yes                |
| Puromycin          | 0.958235          | 0.69852  | 10       | 24.67                         | 1.1E-05    | yes                |

Taken together, it can be inferred with confidence that all the three FPs are crucial to achieve the highest accuracy of classifying the reference set as well as identifying the unknowns.

In fact, tdTomato with seemingly less variant fluorescence responses provides great contribution towards the classification ability of the triple-channel sensor.

## Section 7: Supplementary Data

**Supplementary Table 11. Raw fluorescence responses and LDA output data set for the chemotherapeutic-treated BT549 cells.** Score (1), score (2), and score (3) are generated along the first, second, and third discriminants, respectively (corresponding to Fig. 3b).

| Drug name    | $\log_2(I / I_0)$ |          |          | LDA output |           |           |
|--------------|-------------------|----------|----------|------------|-----------|-----------|
|              | EBFP2             | EGFP     | tdTomato | Score (1)  | Score (2) | Score (3) |
| Vinblastin   | 0.46029           | 1.81061  | 0.83199  | -0.33733   | -5.18269  | -2.95159  |
| Vinblastin   | 0.380047          | 1.517309 | 0.810265 | -1.87681   | -6.26215  | -2.00207  |
| Vinblastin   | 0.428491          | 1.663509 | 0.802253 | -0.6889    | -6.26144  | -2.26736  |
| Vinblastin   | 0.371378          | 1.464595 | 0.809039 | -2.16985   | -6.35679  | -1.80236  |
| Vinblastin   | 0.440235          | 1.505213 | 0.821917 | -1.7885    | -5.72053  | -1.51858  |
| Vinblastin   | 0.398748          | 1.470653 | 0.821442 | -2.21073   | -5.89095  | -1.69193  |
| Vinblastin   | 0.411077          | 1.522519 | 0.799521 | -1.44724   | -6.47912  | -1.68849  |
| Vinblastin   | 0.409194          | 1.499347 | 0.817092 | -1.91749   | -5.97106  | -1.71592  |
| Vincristine  | 0.47884           | 1.887598 | 0.821312 | 0.370812   | -5.39908  | -3.10309  |
| Vincristine  | 0.458132          | 1.541584 | 0.769926 | -0.48051   | -7.20105  | -1.17227  |
| Vincristine  | 0.425527          | 1.452845 | 0.806867 | -1.84769   | -6.24968  | -1.27114  |
| Vincristine  | 0.370902          | 1.767977 | 0.792272 | -0.3331    | -6.69309  | -3.20355  |
| Vincristine  | 0.487601          | 1.754317 | 0.792028 | 0.332718   | -6.32262  | -2.14931  |
| Vincristine  | 0.382557          | 1.490518 | 0.813859 | -2.06484   | -6.16091  | -1.87287  |
| Vincristine  | 0.387964          | 1.51053  | 0.788098 | -1.42845   | -6.90481  | -1.74043  |
| Vincristine  | 0.537889          | 1.414379 | 0.839616 | -1.97665   | -4.91747  | -0.36883  |
| Daunorubicin | 0.290611          | 1.342452 | 1.166512 | -10.2611   | 4.033232  | -4.4673   |
| Daunorubicin | 0.237986          | 1.031847 | 1.136932 | -11.5609   | 2.79973   | -3.14123  |
| Daunorubicin | 0.388378          | 0.912308 | 1.10361  | -10.5668   | 2.230349  | -1.03263  |
| Daunorubicin | 0.253959          | 0.730424 | 1.133694 | -12.9006   | 2.588111  | -1.47392  |
| Daunorubicin | 0.335802          | 0.980681 | 1.114151 | -10.7602   | 2.410888  | -1.89482  |



|               |          |          |          |          |          |          |
|---------------|----------|----------|----------|----------|----------|----------|
| Daunorubicin  | 0.381056 | 0.774999 | 1.159992 | -12.3976 | 3.821506 | -0.81627 |
| Daunorubicin  | 0.298169 | 1.005882 | 1.157684 | -11.7194 | 3.606631 | -2.65441 |
| Daunorubicin  | 0.359246 | 1.02196  | 1.182147 | -11.7352 | 4.551149 | -2.39747 |
| Etoposide     | 0.263882 | 1.092634 | 1.126215 | -10.8869 | 2.597442 | -3.14939 |
| Etoposide     | 0.266421 | 0.582569 | 1.071296 | -12.3419 | 0.675232 | -0.17555 |
| Etoposide     | 0.241704 | 0.78753  | 1.083549 | -11.7137 | 1.074914 | -1.4991  |
| Etoposide     | 0.275676 | 0.741085 | 1.116499 | -12.3761 | 2.14986  | -1.21932 |
| Etoposide     | 0.25879  | 0.897028 | 1.081166 | -11.0145 | 1.120591 | -1.88593 |
| Etoposide     | 0.300674 | 1.053831 | 1.095843 | -10.2576 | 1.786211 | -2.42435 |
| Etoposide     | 0.35388  | 0.90617  | 1.144354 | -11.6082 | 3.335384 | -1.58862 |
| Etoposide     | 0.369534 | 0.900618 | 1.183357 | -12.2994 | 4.55412  | -1.712   |
| Doxorubicin   | 0.301946 | 1.167641 | 1.110823 | -9.97471 | 2.30297  | -3.09219 |
| Doxorubicin   | 0.252626 | 0.797817 | 1.061572 | -11.1652 | 0.457361 | -1.29893 |
| Doxorubicin   | 0.222929 | 0.806211 | 1.074457 | -11.5604 | 0.75054  | -1.68494 |
| Doxorubicin   | 0.341384 | 0.867091 | 1.056599 | -10.1682 | 0.639718 | -0.86121 |
| Doxorubicin   | 0.244624 | 1.332412 | 1.109955 | -9.49449 | 2.179048 | -4.3942  |
| Doxorubicin   | 0.240686 | 1.327656 | 1.094736 | -9.24574 | 1.706824 | -4.2931  |
| Doxorubicin   | 0.329514 | 0.987095 | 1.063413 | -9.77711 | 0.871492 | -1.61158 |
| Doxorubicin   | 0.256307 | 1.054607 | 1.089364 | -10.4045 | 1.445764 | -2.75533 |
| Temozolomide  | 0.24285  | 0.553495 | 0.863899 | -8.58582 | -5.6408  | 1.27703  |
| Temozolomide  | 0.453463 | 0.451371 | 0.913575 | -8.74864 | -3.51167 | 3.203663 |
| Temozolomide  | 0.644015 | 0.70445  | 0.890903 | -5.85385 | -3.42219 | 3.708041 |
| Temozolomide  | 0.491118 | 0.880961 | 0.867413 | -5.4707  | -4.5339  | 1.70556  |
| Temozolomide  | 0.56293  | 0.716296 | 0.890127 | -6.28627 | -3.70666 | 2.970621 |
| Temozolomide  | 0.524007 | 0.818792 | 0.892328 | -6.06144 | -3.71232 | 2.113265 |
| Temozolomide  | 0.520839 | 0.79449  | 0.907881 | -6.50598 | -3.26965 | 2.0953   |
| Temozolomide  | 0.874005 | 0.743587 | 0.932008 | -5.02408 | -1.40781 | 5.153067 |
| 6-Thioguanine | 0.753964 | 0.630333 | 0.884803 | -5.4173  | -3.28323 | 5.050558 |
| 6-Thioguanine | 0.534404 | 0.599958 | 0.88291  | -6.9036  | -4.08193 | 3.364929 |
| 6-Thioguanine | 0.490049 | 0.670069 | 0.865123 | -6.48403 | -4.72313 | 2.769025 |
| 6-Thioguanine | 0.542452 | 0.765211 | 0.847565 | -5.33957 | -5.02405 | 2.862058 |
| 6-Thioguanine | 0.646323 | 0.66954  | 0.906376 | -6.31548 | -2.96973 | 3.789952 |
| 6-Thioguanine | 0.693022 | 0.757648 | 0.912566 | -5.70529 | -2.58093 | 3.697676 |
| 6-Thioguanine | 0.47827  | 0.585993 | 0.919337 | -8.035   | -3.18219 | 2.697015 |

|               |          |          |          |          |          |          |
|---------------|----------|----------|----------|----------|----------|----------|
| 6-Thioguanine | 0.511263 | 0.6918   | 0.907708 | -7.07437 | -3.36344 | 2.529933 |
| Roscovitine   | 1.481512 | 2.791375 | 0.981246 | 8.019372 | 3.211492 | -0.33403 |
| Roscovitine   | 1.520088 | 2.635046 | 0.954074 | 8.011433 | 2.43697  | 0.97122  |
| Roscovitine   | 1.611893 | 2.807801 | 0.946511 | 9.5939   | 2.609078 | 0.935368 |
| Roscovitine   | 1.745599 | 2.928981 | 1.020856 | 9.582234 | 5.348257 | 0.916368 |
| Roscovitine   | 1.71224  | 3.029648 | 1.027333 | 9.749245 | 5.488238 | 0.084046 |
| Roscovitine   | 1.812353 | 2.943817 | 1.05868  | 9.33499  | 6.711663 | 1.130383 |
| Roscovitine   | 1.62934  | 2.831877 | 1.029942 | 8.194416 | 5.183043 | 0.356211 |
| Roscovitine   | 1.730372 | 3.087695 | 1.048841 | 9.732078 | 6.225598 | -0.20983 |
| Olomoucine    | 1.673132 | 2.858371 | 1.001484 | 9.155582 | 4.488599 | 0.799449 |
| Olomoucine    | 1.56894  | 2.967676 | 0.981787 | 9.433964 | 3.614257 | -0.48339 |
| Olomoucine    | 1.673112 | 2.973207 | 1.002772 | 9.702812 | 4.590871 | 0.215005 |
| Olomoucine    | 1.680373 | 2.948203 | 0.99496  | 9.776022 | 4.366605 | 0.458137 |
| Olomoucine    | 1.681203 | 3.088029 | 0.980645 | 10.75768 | 4.017468 | -0.131   |
| Olomoucine    | 1.728634 | 2.953381 | 1.052093 | 8.988169 | 6.242891 | 0.424364 |
| Olomoucine    | 1.705593 | 2.833042 | 1.003425 | 9.194247 | 4.639975 | 1.185906 |
| Olomoucine    | 1.561515 | 2.763998 | 0.981421 | 8.379332 | 3.465753 | 0.476394 |
| Cisplatin     | 0.955463 | 1.120609 | 1.005457 | -4.06924 | 1.273854 | 3.419105 |
| Cisplatin     | 0.91456  | 1.335061 | 0.979145 | -2.74212 | 0.468383 | 2.191539 |
| Cisplatin     | 1.021664 | 1.278595 | 0.932405 | -1.44208 | -0.6115  | 3.716759 |
| Cisplatin     | 0.95197  | 1.187528 | 0.982773 | -3.31468 | 0.618903 | 3.21931  |
| Cisplatin     | 1.046955 | 1.310746 | 1.069862 | -3.80685 | 3.613667 | 2.771069 |
| Cisplatin     | 0.960188 | 1.143872 | 0.979884 | -3.42458 | 0.535148 | 3.528148 |
| Cisplatin     | 0.897941 | 1.470034 | 1.006944 | -2.7157  | 1.322379 | 1.173817 |
| Cisplatin     | 0.987482 | 1.133257 | 0.996451 | -3.63035 | 1.116436 | 3.691162 |
| Chlorambucil  | 0.915784 | 1.293391 | 0.997033 | -3.29137 | 0.985958 | 2.280613 |
| Chlorambucil  | 0.907607 | 1.187538 | 0.972061 | -3.38272 | 0.151038 | 2.922937 |
| Chlorambucil  | 0.909298 | 1.230225 | 0.926123 | -2.26268 | -1.19786 | 3.057004 |
| Chlorambucil  | 1.019955 | 1.401118 | 0.981318 | -1.79671 | 0.918265 | 2.733796 |
| Chlorambucil  | 0.671492 | 1.292735 | 0.980329 | -4.49496 | -0.32225 | 0.34517  |
| Chlorambucil  | 0.979797 | 1.167068 | 0.975416 | -3.09922 | 0.47874  | 3.609803 |
| Chlorambucil  | 0.876173 | 1.498585 | 1.029895 | -3.15737 | 1.954885 | 0.680678 |
| Chlorambucil  | 0.913574 | 1.228439 | 1.025322 | -4.18117 | 1.791327 | 2.381781 |
| Apicidin      | 1.286911 | 2.408918 | 1.036151 | 3.82511  | 4.00392  | -0.45884 |

|                      |          |          |          |          |          |          |
|----------------------|----------|----------|----------|----------|----------|----------|
| Apicidin             | 1.358421 | 2.202612 | 1.031102 | 3.341972 | 3.974146 | 1.213719 |
| Apicidin             | 1.419501 | 2.515991 | 1.015953 | 5.581591 | 3.895202 | 0.269808 |
| Apicidin             | 1.420256 | 2.401426 | 1.066837 | 4.021933 | 5.360708 | 0.480312 |
| Apicidin             | 1.377233 | 2.381202 | 0.994637 | 5.061612 | 3.041342 | 0.742974 |
| Apicidin             | 1.399874 | 2.363998 | 1.045443 | 4.1256   | 4.630792 | 0.65116  |
| Apicidin             | 1.314384 | 2.482715 | 1.067468 | 3.75337  | 5.075125 | -0.82401 |
| Apicidin             | 1.267388 | 2.210915 | 1.074821 | 1.961208 | 4.989752 | 0.087086 |
| Vorinostat           | 1.335615 | 2.429201 | 1.062762 | 3.711098 | 4.974364 | -0.34289 |
| Vorinostat           | 1.165903 | 2.322986 | 1.039631 | 2.57271  | 3.661068 | -1.07429 |
| Vorinostat           | 1.27831  | 2.2844   | 1.044964 | 2.978595 | 4.170837 | 0.028058 |
| Vorinostat           | 1.206381 | 2.338187 | 1.023428 | 3.217675 | 3.317066 | -0.69142 |
| Vorinostat           | 1.312167 | 2.271006 | 1.02524  | 3.508365 | 3.683462 | 0.52382  |
| Vorinostat           | 1.315973 | 2.343126 | 1.066188 | 3.092412 | 4.964513 | -0.10245 |
| Vorinostat           | 1.311374 | 2.407644 | 1.068408 | 3.341969 | 5.051724 | -0.48038 |
| Vorinostat           | 1.313587 | 2.456546 | 1.061648 | 3.731532 | 4.88337  | -0.65747 |
| Hydrogen peroxide    | 1.620219 | 3.488785 | 0.697291 | 18.14489 | -1.76265 | -1.9612  |
| Hydrogen peroxide    | 1.312069 | 3.411004 | 0.725453 | 16.34856 | 0.109502 | -0.86531 |
| Hydrogen peroxide    | 1.481707 | 3.251791 | 0.73834  | 17.7015  | -0.34352 | -0.58014 |
| Hydrogen peroxide    | 1.504301 | 3.201843 | 0.741305 | 19.2286  | -1.09804 | 0.536763 |
| Hydrogen peroxide    | 1.397866 | 3.154278 | 0.721031 | 18.03658 | -0.5116  | 0.54902  |
| Hydrogen peroxide    | 1.473657 | 3.131516 | 0.705418 | 15.1054  | -2.36669 | -0.11895 |
| Hydrogen peroxide    | 1.441867 | 2.773747 | 0.747939 | 16.42744 | -2.08836 | -1.11461 |
| Hydrogen peroxide    | 1.45703  | 2.873859 | 0.730249 | 12.09778 | -1.94325 | 0.037757 |
| Sodium nitroprusside | 1.340388 | 3.327158 | 0.705639 | 15.18832 | -5.22575 | -2.2055  |
| Sodium nitroprusside | 1.307178 | 3.288366 | 0.792712 | 13.0878  | -2.74466 | -2.92352 |
| Sodium nitroprusside | 1.576952 | 3.29071  | 0.794769 | 14.74492 | -1.79079 | -0.6753  |
| Sodium nitroprusside | 1.461543 | 3.362476 | 0.80259  | 14.22895 | -1.89746 | -2.06458 |
| Sodium nitroprusside | 1.344505 | 3.316989 | 0.814749 | 13.03358 | -1.94438 | -2.91206 |
| Sodium nitroprusside | 1.841151 | 3.295679 | 0.754473 | 17.20701 | -2.12453 | 1.820263 |
| Sodium nitroprusside | 1.549163 | 3.356486 | 0.831951 | 14.17343 | -0.73058 | -1.50891 |
| Sodium nitroprusside | 1.657052 | 3.372415 | 0.785417 | 15.83527 | -1.76155 | -0.34101 |

**Supplementary Table 12. Fluorescence responses and LDA output data set for the chemotherapeutic-treated pTD cells.** Score (1), score (2), and score (3) are generated along the first, second, and third discriminants, respectively (corresponding to Supplementary Fig. 10b).

| Drug name   | $\log_2(I / I_0)$ |          |          | LDA output |           |           |
|-------------|-------------------|----------|----------|------------|-----------|-----------|
|             | EBFP2             | EGFP     | tdTomato | Score (1)  | Score (2) | Score (3) |
| Vinblastin  | 0.630556          | 1.957531 | 1.680709 | 0.504259   | -4.91872  | 1.688903  |
| Vinblastin  | 0.401922          | 1.927864 | 1.635725 | -0.88552   | -4.50096  | -1.44021  |
| Vinblastin  | 0.435552          | 1.695543 | 1.616662 | -3.50084   | -3.46025  | 0.251953  |
| Vinblastin  | 0.412167          | 1.729815 | 1.632945 | -3.50084   | -3.46025  | 0.251953  |
| Vinblastin  | 0.434028          | 2.043613 | 1.689536 | -3.09337   | -4.22442  | 0.084623  |
| Vinblastin  | 0.446365          | 1.723553 | 1.612482 | 0.860025   | -6.41012  | -0.85241  |
| Vinblastin  | 0.56714           | 2.04731  | 1.646829 | -3.17556   | -3.25813  | 0.072004  |
| Vinblastin  | 0.540976          | 2.086295 | 1.626352 | 1.086291   | -4.05438  | -0.34924  |
| Vincristine | 0.886513          | 2.612557 | 1.681916 | 8.739679   | -3.89615  | -0.44734  |
| Vincristine | 0.902607          | 2.555101 | 1.689547 | 8.196373   | -4.05917  | 0.30796   |
| Vincristine | 0.78999           | 2.588394 | 1.664533 | 8.032228   | -3.77357  | -1.64863  |
| Vincristine | 0.741848          | 2.587967 | 1.644509 | 7.739072   | -3.2921   | -2.56823  |
| Vincristine | 0.764939          | 2.459168 | 1.645238 | 6.374786   | -3.11492  | -1.35018  |
| Vincristine | 0.718142          | 2.445098 | 1.657676 | 6.135671   | -3.83885  | -1.48515  |
| Vincristine | 0.749986          | 2.42496  | 1.639104 | 5.901396   | -2.94893  | -1.38054  |
| Vincristine | 0.782768          | 2.422856 | 1.690048 | 6.307152   | -4.67853  | 0.032229  |
| Paclitaxel  | 0.577658          | 1.998416 | 1.644243 | 0.556444   | -3.86955  | 0.072731  |
| Paclitaxel  | 0.612453          | 2.026605 | 1.646813 | 1.007238   | -3.78599  | 0.284703  |
| Paclitaxel  | 0.647319          | 2.012569 | 1.619186 | 0.795224   | -2.54198  | 0.189376  |
| Paclitaxel  | 0.587927          | 1.970928 | 1.641409 | 0.264721   | -3.68916  | 0.327687  |
| Paclitaxel  | 0.429575          | 1.936762 | 1.628178 | -0.73889   | -4.0661   | -1.36887  |
| Paclitaxel  | 0.548253          | 1.899939 | 1.623889 | -0.77689   | -3.21338  | 0.074423  |
| Paclitaxel  | 0.517597          | 1.930853 | 1.625483 | -0.52357   | -3.46428  | -0.44761  |
| Paclitaxel  | 0.436949          | 1.914318 | 1.644195 | -0.866     | -4.61391  | -0.7937   |
| Cisplatin   | 1.124965          | 2.69522  | 1.664108 | 10.366     | -1.92747  | 1.097686  |
| Cisplatin   | 1.171314          | 2.707877 | 1.680162 | 10.76568   | -2.27678  | 1.825492  |

|               |          |          |          |          |          |          |
|---------------|----------|----------|----------|----------|----------|----------|
| Cisplatin     | 1.238316 | 2.741382 | 1.669884 | 11.3052  | -1.53118 | 2.074476 |
| Cisplatin     | 1.221971 | 2.74838  | 1.649104 | 11.19859 | -0.84601 | 1.421027 |
| Cisplatin     | 1.217497 | 2.748448 | 1.655691 | 11.22532 | -1.11904 | 1.508819 |
| Cisplatin     | 1.176029 | 2.731926 | 1.676629 | 11.02983 | -2.13117 | 1.623738 |
| Cisplatin     | 1.13752  | 2.742506 | 1.646217 | 10.82813 | -1.21099 | 0.510279 |
| Cisplatin     | 1.076274 | 2.713351 | 1.661412 | 10.38773 | -2.1115  | 0.39124  |
| Chlorambucil  | 1.235347 | 2.766191 | 1.633633 | 11.34744 | -0.1989  | 1.111473 |
| Chlorambucil  | 1.175601 | 2.733356 | 1.639049 | 10.8097  | -0.72105 | 0.834211 |
| Chlorambucil  | 1.030869 | 2.661956 | 1.625798 | 9.43381  | -0.99889 | -0.44138 |
| Chlorambucil  | 1.303803 | 2.766129 | 1.665821 | 11.77998 | -1.02284 | 2.500651 |
| Chlorambucil  | 0.9696   | 2.824435 | 1.624308 | 11.04228 | -1.38249 | -2.33026 |
| Chlorambucil  | 1.323343 | 2.708493 | 1.664513 | 11.1905  | -0.83007 | 3.109586 |
| Chlorambucil  | 1.102844 | 2.647764 | 1.622652 | 9.498818 | -0.46593 | 0.362142 |
| Chlorambucil  | 0.989329 | 2.610561 | 1.631821 | 8.753078 | -1.43039 | -0.3751  |
| Carboplatin   | 1.063679 | 2.73337  | 1.643247 | 10.45647 | -1.51101 | -0.26547 |
| Carboplatin   | 1.190691 | 2.675835 | 1.635091 | 10.18987 | -0.45383 | 1.34055  |
| Carboplatin   | 1.19318  | 2.673393 | 1.603239 | 9.971919 | 0.759542 | 0.728786 |
| Carboplatin   | 1.262736 | 2.669629 | 1.595958 | 10.12006 | 1.428331 | 1.343887 |
| Carboplatin   | 1.228341 | 2.61973  | 1.59369  | 9.428578 | 1.348156 | 1.303916 |
| Carboplatin   | 1.222154 | 2.628996 | 1.616273 | 9.652765 | 0.458559 | 1.63473  |
| Carboplatin   | 1.199825 | 2.659926 | 1.635312 | 10.04347 | -0.4014  | 1.560267 |
| Carboplatin   | 1.285613 | 2.681033 | 1.60343  | 10.37246 | 1.269928 | 1.655446 |
| Gemcitabin    | 0.86328  | 2.11592  | 1.576631 | 2.423125 | 0.218476 | 0.832212 |
| Gemcitabin    | 0.79707  | 1.98594  | 1.614163 | 0.972568 | -1.49204 | 1.870975 |
| Gemcitabin    | 0.686703 | 1.889941 | 1.586165 | -0.65527 | -1.00703 | 0.838742 |
| Gemcitabin    | 0.625041 | 1.99694  | 1.562156 | 0.187844 | -0.51396 | -1.10554 |
| Gemcitabin    | 0.64547  | 2.090814 | 1.592199 | 1.49953  | -1.58257 | -0.96846 |
| Gemcitabin    | 0.741564 | 1.839227 | 1.566843 | -1.15971 | 0.058678 | 1.399327 |
| Gemcitabin    | 0.730865 | 2.049459 | 1.564365 | 1.150649 | -0.02967 | -0.32932 |
| Gemcitabin    | 0.600512 | 1.949159 | 1.570936 | -0.37737 | -0.95514 | -0.82906 |
| 6-Thioguanine | 0.688536 | 1.965869 | 1.553561 | 0.000404 | 0.185772 | -0.37858 |
| 6-Thioguanine | 0.619743 | 1.917595 | 1.545358 | -0.82656 | 0.133622 | -0.91747 |

|               |          |          |          |          |          |          |
|---------------|----------|----------|----------|----------|----------|----------|
| 6-Thioguanine | 0.615466 | 1.908244 | 1.537634 | -0.99438 | 0.405323 | -1.05236 |
| 6-Thioguanine | 0.509227 | 1.920736 | 1.551439 | -1.12812 | -0.72102 | -1.98671 |
| 6-Thioguanine | 0.618073 | 1.880192 | 1.550011 | -1.22342 | -0.02925 | -0.561   |
| 6-Thioguanine | 0.568824 | 1.997175 | 1.530262 | -0.19941 | 0.367951 | -2.36023 |
| 6-Thioguanine | 0.582786 | 1.873655 | 1.550389 | -1.41419 | -0.23899 | -0.87851 |
| 6-Thioguanine | 0.524241 | 1.848715 | 1.558608 | -1.84164 | -0.86434 | -1.14403 |
| Doxorubicin   | 0.297262 | 1.358871 | 1.505767 | -8.44534 | 0.123459 | -0.99363 |
| Doxorubicin   | 0.277678 | 1.430376 | 1.480565 | -7.86577 | 0.919464 | -2.25249 |
| Doxorubicin   | 0.348069 | 1.256603 | 1.501721 | -9.44735 | 0.621476 | 0.222335 |
| Doxorubicin   | 0.281748 | 1.278143 | 1.491812 | -9.49217 | 0.60717  | -0.84494 |
| Doxorubicin   | 0.361372 | 1.324882 | 1.503919 | -8.62134 | 0.574587 | -0.09942 |
| Doxorubicin   | 0.332713 | 1.409132 | 1.494201 | -7.83262 | 0.729646 | -1.23021 |
| Doxorubicin   | 0.349506 | 1.472089 | 1.502145 | -7.01867 | 0.489455 | -1.35699 |
| Doxorubicin   | 0.314372 | 1.419098 | 1.480997 | -7.86533 | 1.116917 | -1.77079 |
| Daunorubicin  | 0.308974 | 1.477233 | 1.526707 | -6.94493 | -0.66615 | -1.31869 |
| Daunorubicin  | 0.32402  | 1.449659 | 1.533756 | -7.15967 | -0.83042 | -0.80884 |
| Daunorubicin  | 0.322749 | 1.383207 | 1.534893 | -7.90353 | -0.84204 | -0.30446 |
| Daunorubicin  | 0.307977 | 1.39178  | 1.560813 | -7.69541 | -1.90521 | 0.009289 |
| Daunorubicin  | 0.31671  | 1.378203 | 1.53364  | -7.98806 | -0.82614 | -0.35704 |
| Daunorubicin  | 0.325987 | 1.508397 | 1.514276 | -6.61472 | -0.12051 | -1.62642 |
| Daunorubicin  | 0.308587 | 1.398851 | 1.506587 | -7.95259 | 0.133521 | -1.15419 |
| Daunorubicin  | 0.314391 | 1.365078 | 1.556076 | -8.00326 | -1.67547 | 0.178339 |
| Camptothecin  | 0.136312 | 0.652756 | 1.471979 | -17.1361 | 0.892176 | 1.858219 |
| Camptothecin  | 0.274602 | 0.630702 | 1.431294 | -17.1689 | 3.215963 | 2.649517 |
| Camptothecin  | 0.009483 | 0.519143 | 1.47653  | -19.039  | 0.081804 | 1.602046 |
| Camptothecin  | 0.267718 | 0.574035 | 1.394001 | -18.0619 | 4.612283 | 2.229763 |
| Camptothecin  | -0.02895 | 0.479855 | 1.403553 | -20.0667 | 2.631929 | -0.01665 |
| Camptothecin  | 0.149514 | 0.480191 | 1.392692 | -19.5254 | 4.048045 | 1.648379 |
| Camptothecin  | 0.290864 | 0.493261 | 1.418027 | -18.7409 | 3.885956 | 3.571091 |
| Camptothecin  | 0.109625 | 0.449518 | 1.399135 | -19.9651 | 3.598172 | 1.586609 |
| Irinotecan    | -0.01797 | 0.454143 | 1.367814 | -20.5415 | 4.052881 | -0.44531 |
| Irinotecan    | -0.15665 | 0.558302 | 1.449392 | -19.332  | 0.141691 | -1.00904 |

|                      |          |          |          |          |          |          |
|----------------------|----------|----------|----------|----------|----------|----------|
| Irinotecan           | -0.06199 | 0.44893  | 1.392628 | -20.5944 | 2.874087 | -0.36174 |
| Irinotecan           | -0.13783 | 0.460991 | 1.431576 | -20.4729 | 0.974091 | -0.45265 |
| Irinotecan           | -0.08313 | 0.560204 | 1.42537  | -19.2114 | 1.459164 | -0.73912 |
| Irinotecan           | -0.01824 | 0.295653 | 1.521986 | -21.3602 | -1.65551 | 3.907726 |
| Irinotecan           | -0.3494  | 0.431042 | 1.510202 | -21.0358 | -3.16044 | -0.85185 |
| Irinotecan           | -0.29223 | 0.334469 | 1.459628 | -22.2429 | -0.87995 | -0.56956 |
| Sodium nitroprusside | 1.439304 | 2.661759 | 1.538715 | 10.27296 | 4.582811 | 2.094137 |
| Sodium nitroprusside | 1.425193 | 2.617447 | 1.508984 | 9.541505 | 5.646792 | 1.661684 |
| Sodium nitroprusside | 1.342859 | 2.67758  | 1.55496  | 10.22507 | 3.418096 | 1.289067 |
| Sodium nitroprusside | 1.317269 | 2.588025 | 1.533766 | 8.99966  | 4.122276 | 1.247499 |
| Sodium nitroprusside | 1.256974 | 2.61168  | 1.556089 | 9.200386 | 2.928583 | 0.892496 |
| Sodium nitroprusside | 1.333782 | 2.664011 | 1.511392 | 9.769687 | 5.013199 | 0.396116 |
| Sodium nitroprusside | 1.287174 | 2.679908 | 1.511017 | 9.787883 | 4.754916 | -0.2238  |
| Sodium nitroprusside | 1.308869 | 2.64991  | 1.517661 | 9.56591  | 4.644858 | 0.366204 |
| Hydrogen peroxide    | 1.280304 | 2.67307  | 1.460555 | 9.372544 | 6.617892 | -1.28552 |
| Hydrogen peroxide    | 1.161565 | 2.59995  | 1.444539 | 8.048212 | 6.591827 | -2.32981 |
| Hydrogen peroxide    | 1.247158 | 2.605825 | 1.433333 | 8.334537 | 7.493246 | -1.69737 |
| Hydrogen peroxide    | 1.202649 | 2.65799  | 1.430024 | 8.749024 | 7.336279 | -2.62536 |
| Hydrogen peroxide    | 1.406545 | 2.604326 | 1.426408 | 8.815034 | 8.654625 | -0.13979 |
| Hydrogen peroxide    | 1.313312 | 2.624207 | 1.428027 | 8.732311 | 8.055769 | -1.24238 |
| Hydrogen peroxide    | 1.194607 | 2.690205 | 1.424677 | 9.050307 | 7.473393 | -3.06044 |
| Hydrogen peroxide    | 1.271207 | 2.612001 | 1.43927  | 8.522581 | 7.402212 | -1.36613 |

**Supplementary Table 13. Fluorescence response data from drug candidates and their combinations using BT549 cells.** Score (1), score (2), and score (3) are generated along the first, second, and third discriminants, respectively (corresponding to Fig. 4b,c,d).

| Drug name    | $\log_2(I / I_0)$ |          |          | LDA output |           |           |
|--------------|-------------------|----------|----------|------------|-----------|-----------|
|              | EBFP2             | EGFP     | tdTomato | Score (1)  | Score (2) | Score (3) |
| PUR-APG(1:1) | 0.729879          | 0.973113 | 0.675937 | 5.520782   | 4.907233  | -0.12995  |
| PUR-APG(1:1) | 0.812728          | 1.22745  | 0.674566 | 5.83439    | 5.893113  | -1.22432  |
| PUR-APG(1:1) | 0.591799          | 0.892395 | 0.703146 | 4.596559   | 3.178478  | 0.161429  |

|              |          |          |          |          |          |          |
|--------------|----------|----------|----------|----------|----------|----------|
| PUR-APG(1:1) | 1.015348 | 0.891376 | 0.659702 | 5.94494  | 8.566886 | 0.478503 |
| PUR-APG(1:1) | 0.712939 | 0.860641 | 0.740408 | 3.42826  | 4.748557 | 0.482642 |
| PUR-APG(1:1) | 0.665525 | 1.118378 | 0.774402 | 2.656983 | 4.085279 | -0.68531 |
| PUR-APG(1:1) | 0.796373 | 1.293681 | 0.753162 | 3.497753 | 5.697772 | -1.40727 |
| PUR-APG(1:1) | 0.644193 | 1.19995  | 0.729385 | 4.119737 | 3.772008 | -1.15735 |
| PUR-APG(3:1) | 0.352239 | 0.718765 | 0.62538  | 6.782801 | 0.137884 | 0.604738 |
| PUR-APG(3:1) | 0.523196 | 0.829024 | 0.659261 | 5.869857 | 2.302778 | 0.31361  |
| PUR-APG(3:1) | 0.448536 | 0.865448 | 0.614883 | 7.263011 | 1.321742 | 0.001174 |
| PUR-APG(3:1) | 0.516575 | 0.620904 | 0.595459 | 7.603212 | 2.250475 | 1.152659 |
| PUR-APG(3:1) | 0.370689 | 0.636177 | 0.669956 | 5.332344 | 0.414483 | 1.078041 |
| PUR-APG(3:1) | 0.538742 | 0.500122 | 0.637354 | 6.194798 | 2.584081 | 1.800095 |
| PUR-APG(3:1) | 0.501424 | 0.751816 | 0.661113 | 5.730845 | 2.0472   | 0.651405 |
| PUR-APG(3:1) | 0.47177  | 0.754987 | 0.639533 | 6.393334 | 1.659093 | 0.572327 |
| PUR-CSP(1:1) | -0.08615 | 1.622911 | 0.888862 | -3.94154 | -4.88514 | 2.473551 |
| PUR-CSP(1:1) | 0.045809 | 1.085335 | 0.824777 | -3.78735 | -2.61982 | 0.185421 |
| PUR-CSP(1:1) | 0.282299 | 0.933211 | 0.849196 | -1.43582 | -1.59412 | -0.77301 |
| PUR-CSP(1:1) | 0.248663 | 1.370993 | 0.856552 | -1.49937 | -1.97369 | 1.420009 |
| PUR-CSP(1:1) | 0.295679 | 1.064149 | 0.845494 | -1.32605 | -1.42426 | -0.07359 |
| PUR-CSP(1:1) | 0.246915 | 0.939114 | 0.86624  | -1.52189 | -2.19937 | -0.86808 |
| PUR-CSP(1:1) | 0.367902 | 1.21823  | 0.877871 | -0.21939 | -1.65354 | 0.48021  |
| PUR-CSP(1:1) | 0.313811 | 1.178281 | 0.87533  | -0.74057 | -1.95505 | 0.293397 |
| PUR-CSP(1:3) | 0.132131 | 0.81462  | 0.816707 | -3.21815 | -1.87618 | -1.14437 |
| PUR-CSP(1:3) | 0.173898 | 0.822729 | 0.784728 | -3.26717 | -0.90283 | -0.86768 |
| PUR-CSP(1:3) | 0.12376  | 0.854606 | 0.813764 | -3.31787 | -1.86689 | -0.91756 |
| PUR-CSP(1:3) | 0.158445 | 0.882777 | 0.782024 | -3.4198  | -0.94534 | -0.5397  |
| PUR-CSP(1:3) | 0.188832 | 1.110528 | 0.847513 | -2.22451 | -2.17263 | 0.148891 |
| PUR-CSP(1:3) | 0.198981 | 0.889976 | 0.854416 | -2.11334 | -2.25775 | -1.03387 |
| PUR-CSP(1:3) | 0.222699 | 1.165705 | 0.84713  | -1.91468 | -1.94059 | 0.435187 |
| PUR-CSP(1:3) | 0.245328 | 0.982695 | 0.788376 | -2.54183 | -0.51037 | -0.07279 |
| APG-CSP(1:3) | 0.955424 | 1.106008 | 1.065095 | 2.150454 | 1.22986  | 1.540538 |
| APG-CSP(1:3) | 0.973441 | 1.146331 | 1.024337 | 2.947571 | 0.338855 | 1.103135 |
| APG-CSP(1:3) | 0.958712 | 1.206851 | 1.068932 | 2.133698 | 1.277091 | 0.893998 |
| APG-CSP(1:3) | 1.086559 | 1.295259 | 1.078068 | 3.475459 | 2.01656  | 0.859529 |
| APG-CSP(1:3) | 1.010819 | 1.272161 | 1.057487 | 2.900085 | 1.208548 | 0.593887 |
| APG-CSP(1:3) | 1.08917  | 1.315773 | 1.082389 | 3.443245 | 2.117385 | 0.756312 |



|              |          |          |          |          |          |          |
|--------------|----------|----------|----------|----------|----------|----------|
| APG-CSP(1:3) | 1.043034 | 1.304583 | 1.081454 | 2.925078 | 1.893858 | 0.642389 |
| APG-CSP(1:3) | 1.09638  | 1.359673 | 1.07246  | 3.670222 | 1.893789 | 0.430575 |
| APG-CSP(3:1) | 1.019645 | 1.367773 | 1.059276 | 2.976692 | 1.236013 | -0.00706 |
| APG-CSP(3:1) | 1.120779 | 1.481068 | 1.036317 | 4.474826 | 1.093258 | -0.50281 |
| APG-CSP(3:1) | 1.124744 | 1.524248 | 1.032358 | 4.578105 | 0.99451  | -0.80197 |
| APG-CSP(3:1) | 1.122181 | 1.525788 | 1.059937 | 4.84126  | 1.895141 | -0.42298 |
| APG-CSP(3:1) | 1.131429 | 1.557854 | 1.118681 | 3.407533 | 3.016616 | -0.50134 |
| APG-CSP(3:1) | 1.238708 | 1.661483 | 1.056737 | 5.539958 | 1.998848 | -1.13355 |
| APG-CSP(3:1) | 1.175445 | 1.606648 | 1.116401 | 3.948054 | 3.134436 | -0.66885 |
| APG-CSP(3:1) | 1.133266 | 1.764256 | 1.097466 | 6.041556 | 3.316054 | -1.2146  |

## Section 8: <sup>1</sup>H NMR Spectra

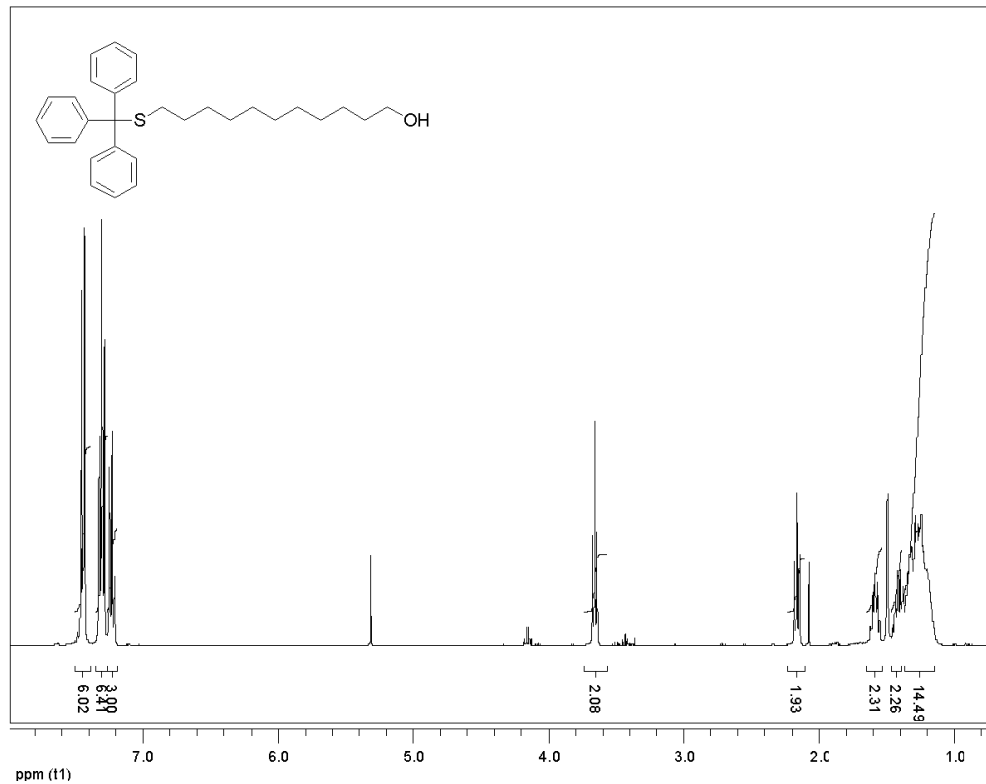

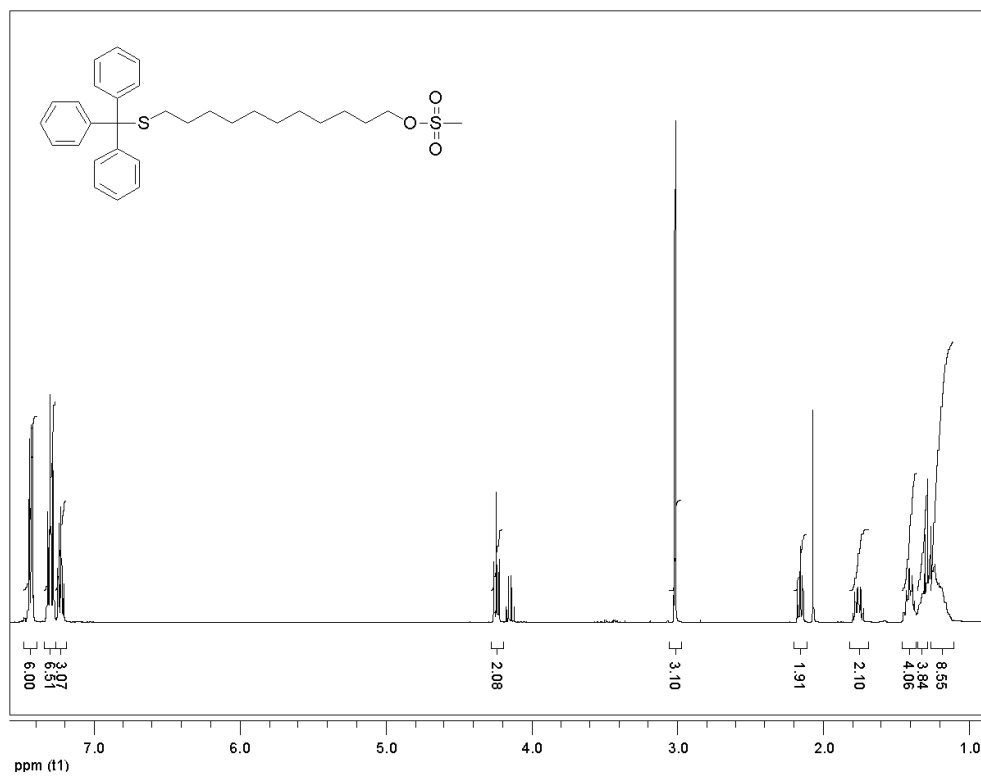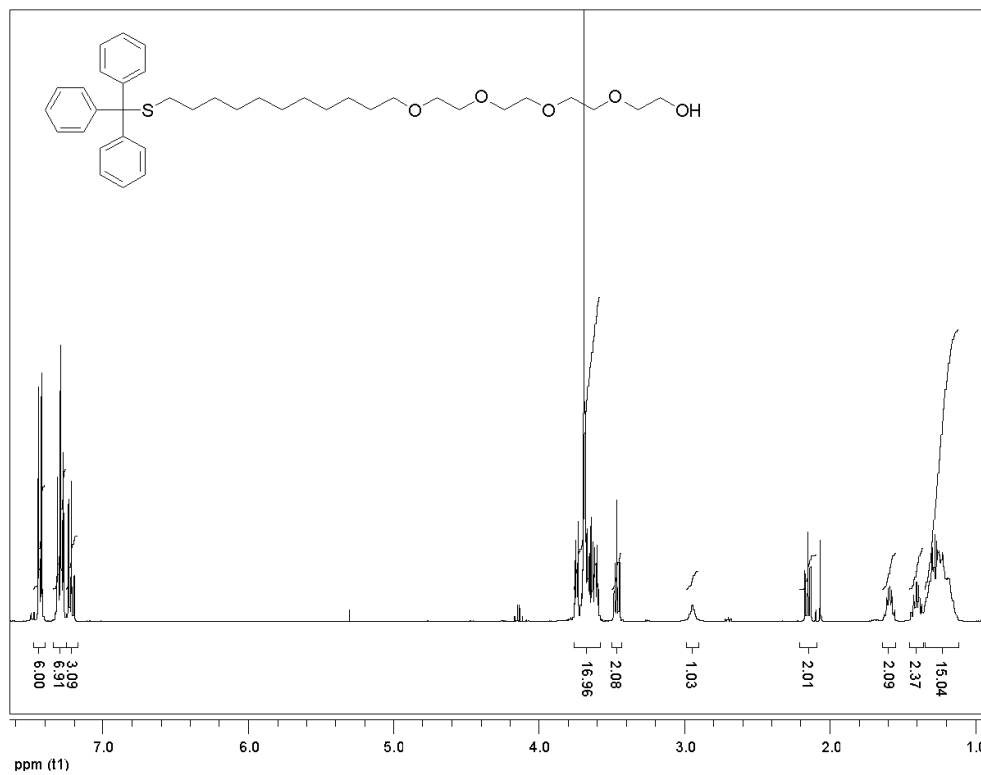

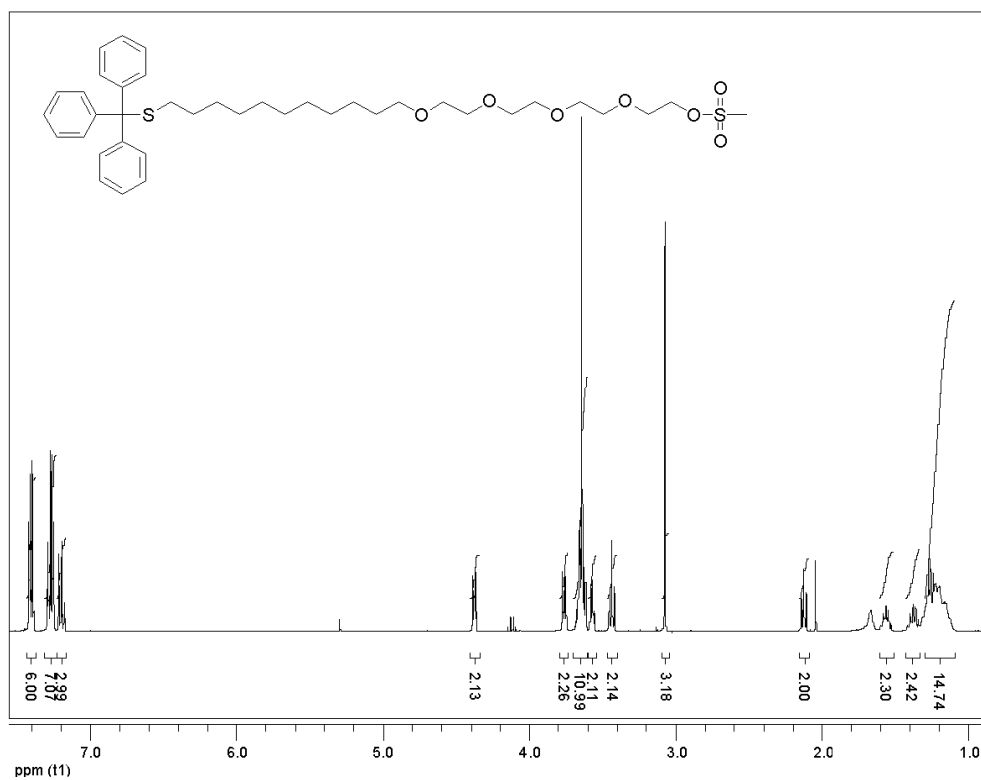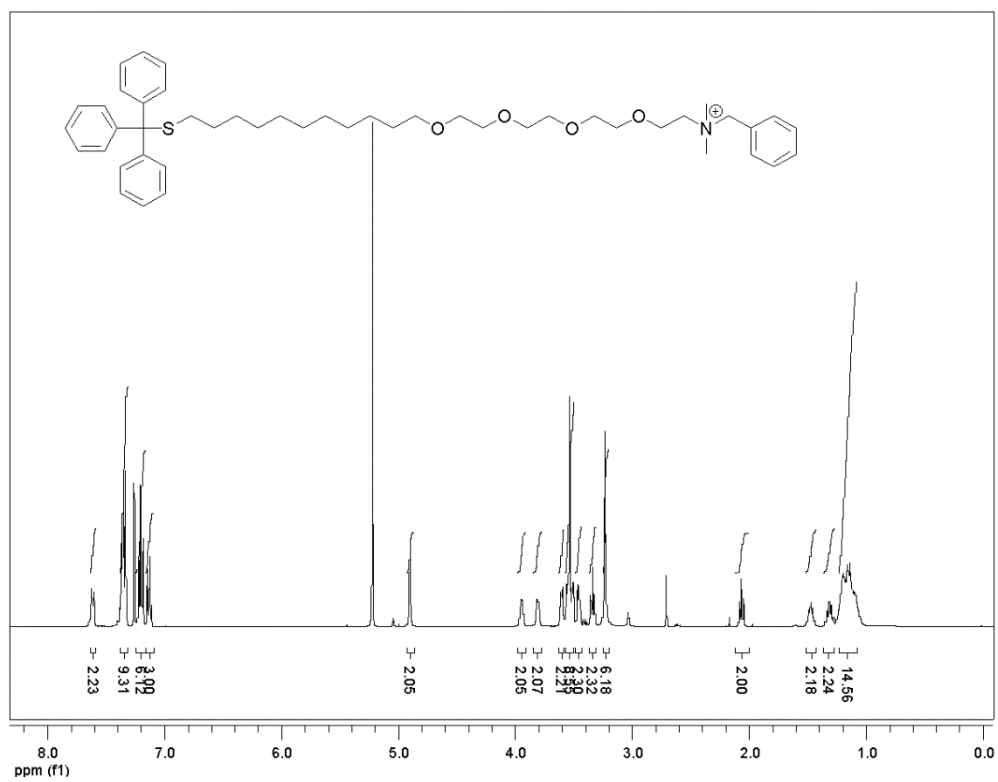

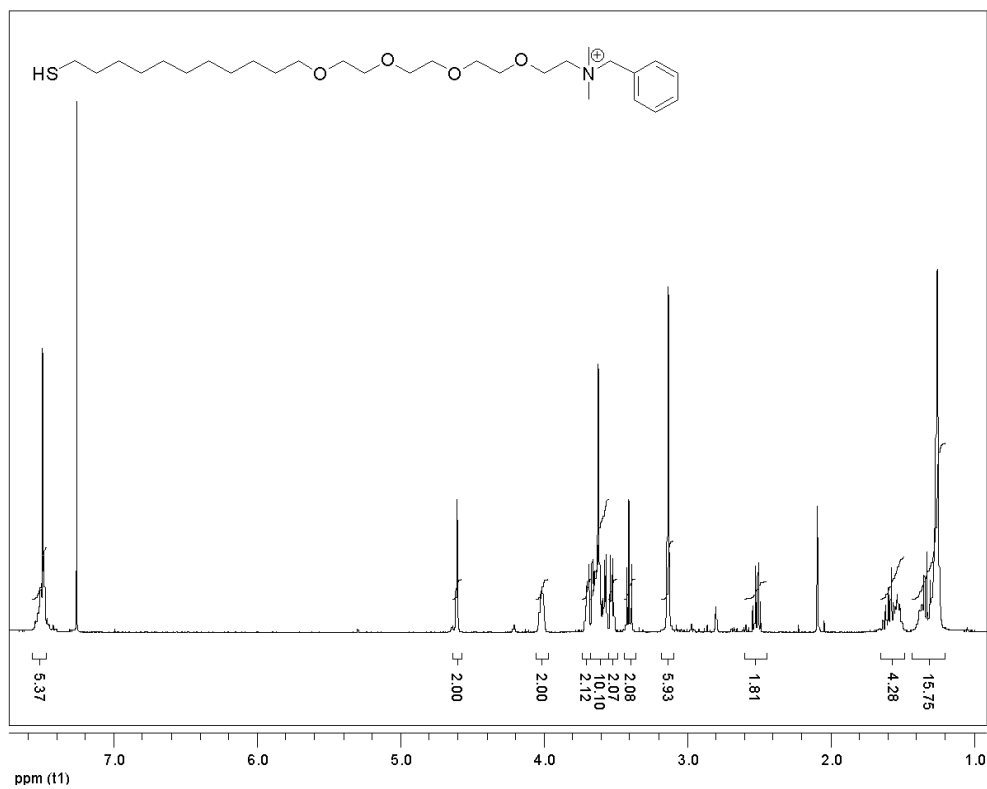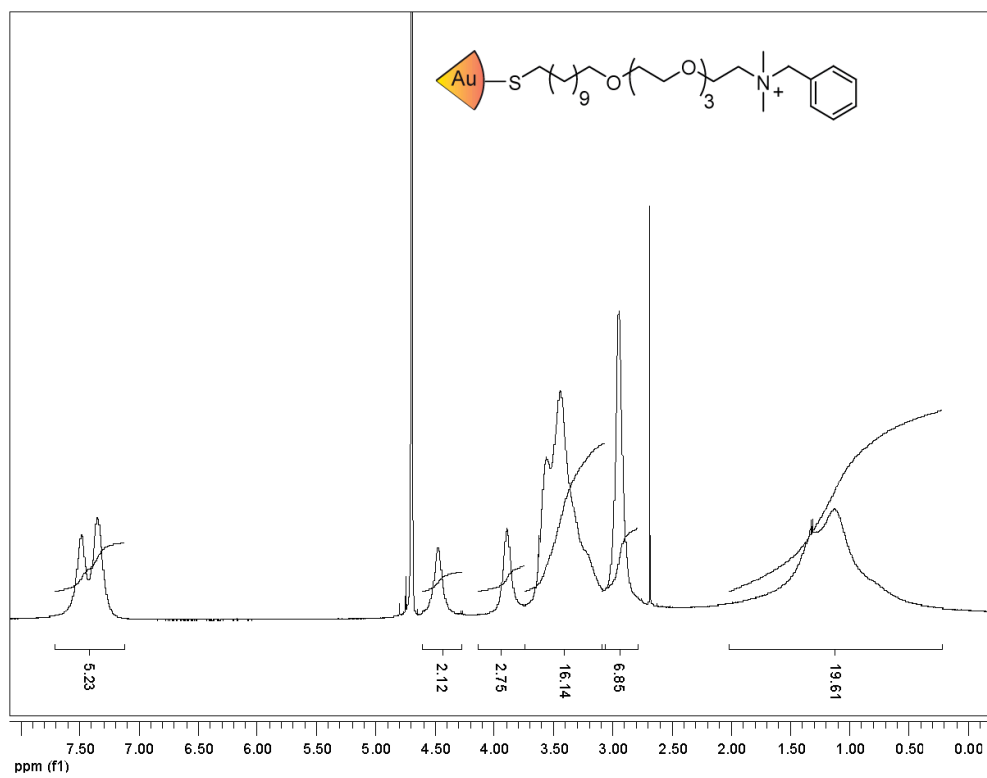

## Supplementary References

---

1. Ai, H. W. *et al.*, Exploration of new chromophore structures leads to the identification of improved blue fluorescent proteins. *Biochemistry* **46**, 5904-5910 (2007).
2. Carroll, P. *et al.*, Sensitive detection of gene expression in mycobacteria under replicating and non-replicating conditions using optimized far-red reporters. *PLoS One*. **5**, e9823 (2010).
3. Nandwana, V. *et al.*, Patterning of protein/quantum dot hybrid bionanostructures. *J. Inorg. Organomet. Polym. Mater.* **23**, 227-232 (2013).
4. De, M., Rana, S. & Rotello, V. M. Nickel-ion-mediated control of the stoichiometry of His-tagged protein/nanoparticle interactions. *Macromol. Biosci.* **9**, 174-178 (2009).
5. Miranda, A. *et al.*, Enzyme-amplified array sensing of proteins in solution and in biofluids. *J. Am. Chem. Soc.* **132**, 5285-5289 (2010).
6. Bajaj, A. *et al.*, Detection and differentiation of normal, cancerous, and metastatic cells using nanoparticle-polymer sensor arrays. *Proc. Natl. Acad. Sci. U.S.A.* **106**, 10912-10916 (2009).
7. Kanaras, A. G., Kamounah, F. S., Schaumburg, K., Kiely, C. J. & Brust, M. Thioalkylated tetraethylene glycol: a new ligand for water soluble monolayer protected gold clusters. *Chem. Commun.* 2294-2295 (2002).
8. Brust, M., Walker, M., Bethell, D., Schiffrin, D. J. & Whyman, R. Synthesis of thiol-derivatised gold nanoparticles in a two-phase liquid-liquid system. *J. Chem. Soc. Chem. Commun.* 801-802 (1994).
9. Templeton, A. C., Wuelfing, M. P. & Murray, R. W. Monolayer-protected cluster molecules. *Acc. Chem. Res.* **33**, 27-36 (2000).
10. You, C. C., De, M., Han, G. & Rotello, V. M. Tunable Inhibition and Denaturation of Alpha-Chymotrypsin with Amino Acid-Functionalized Gold Nanoparticles. *J. Am. Chem. Soc.* **127**, 12873-12881 (2005).
11. Phillips, R. L. *et al.*, Gold Nanoparticle-PPE Constructs as Biomolecular Material Mimics: Understanding the Electrostatic and Hydrophobic Interactions” *Soft Matter* **5**, 607-612 (2009).

- 
12. Dunphy, K. A. *et al.* Oncogenic transformation of mammary epithelial cells by transforming growth factor beta independent of mammary stem cell regulation. *Cancer Cell Int.* **13**, 74 (2013).
  13. Nandakumar, D. N., Nagaraj, V. A., Vathsala, P. G., Rangarajan, P. & Padmanaban, G. Curcumin-artemisinin combination therapy for malaria. *Antimicrob. Agents Chemother.* **50**, 1859-1860 (2006).
  14. Loewe, S. The problem of synergism and antagonism of combined drugs. *Arzneimittelforschung* **3**, 285-290 (1953).
  15. Greco, W. R., Bravo, G. & Parsons, J. C. The search for synergy: a critical review from a response surface perspective. *Pharmacol. Rev.* **47**, 331-385 (1995).
  16. R Development Core Team (2010). *R: A language and environment for statistical computing*. R Foundation for Statistical Computing, Vienna, Austria. ISBN 3-900051-07-0, URL <http://www.R-project.org>.
  17. Venables, W. N. & Ripley, B. D. (2002). *Modern Applied Statistics with S*. Fourth Edition. Springer, New York. ISBN 0-387-95457-0.
  18. Hardin, J. & Rojke, D. M. The distribution of robust distances. *J. Comput. Graph. Stat.* **14**, 928-946 (2005).
